# Supplementary material for: A Multinational Longitudinal Study Incorporating Intensive Methods to Examine Caregiver Experiences in the Context of Chronic Health Conditions: Protocol of the ENTWINE-iCohort
Source: MDPI journal article supplement (doi:10.3390/ijerph19020821), 2022-01-12
Supplement: s1 [file s1]

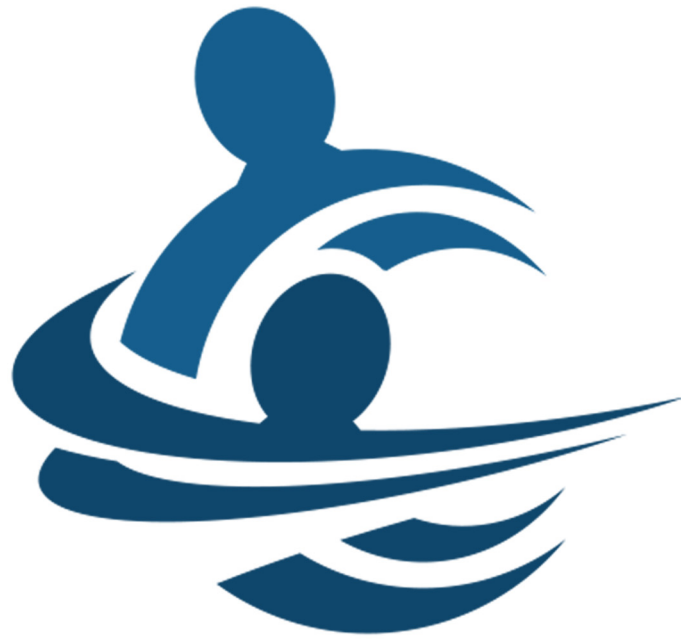

# ENTWINE

## INFORMAL CARE

*The European Training Network on Informal Care*

***ENTWINE-ICOHORT CAREGIVER BASELINE SURVEY***

**1. Would you like to invite the person you provide care for to participate in this study?**

- ☐ Yes. Email address: \_\_\_\_\_
- ☐ Yes, but I would like to provide their email at a later date.
- ☐ Yes, but they do not have an email address.
- ☐ No

This study is being carried out by Bangor University (UK), University Medical Center of Groningen (The Netherlands), National Institute for Health and Science on Ageing (Italy), Bar-Ilan University (Israel) and Uppsala University (Sweden).

Instructions for this questionnaire:

- If you read 'your loved one', then the question refers to the person for whom you are a caregiver.
- Read each question through completely before answering.
- An "Other" option is provided in case you believe that the response options do not describe your situation or the situation of your loved one adequately.
- If you need to take breaks while completing the survey, you can close the survey window at any point and your responses will be automatically saved. We recommend that you fill in this questionnaire using a laptop or tablet.

This questionnaire starts with some questions relating to you.

**2. How old are you?**

\_\_\_\_\_ years.

**3. What is your gender?**

- ☐ Female
- ☐ Male
- ☐ Non-binary / third gender
- ☐ Prefer to self describe:
- ☐ Prefer not to say

**4. Which city/town do you live in?**

\_\_\_\_\_

**5. Is your home located in?**

- ☐ central city/area
- ☐ peripheral area in the city
- ☐ rural area

**6. Please indicate the highest level of education you have achieved**

- ☐ Primary
- ☐ Secondary
- ☐ Post-secondary vocational education (e.g., further education college, apprenticeships etc.)
- ☐ Post secondary academic education (e.g., university)
- ☐ Not listed or other

**7. What is your marital status?**

- ☐ Single (never married) (skip to question 9)
- ☐ Married
- ☐ In a civil union/domestic partnership
- ☐ Divorced (skip to question 9)
- ☐ Widowed (skip to question 9)
- ☐ Other (specify) \_\_\_\_\_

**8. For how long have you been in this relationship?**

Years \_\_\_\_\_ Months \_\_\_\_\_

**9. Do you have children?**

*If you answer "yes", please specify how many children you have.*

- ☐ No (skip to question 12)
- ☐ Yes. I have \_\_\_\_\_ child(ren)

**10. Do you have children under 18 years of age?**

*If you answer "yes", please specify how many children under 18 years old you have.*

- ☐ No
- ☐ Yes. I have \_\_\_\_\_ children under 18 years of age.

**11. Do your children live in your home?**

*If you answer "yes", please specify how many children live in your home.*

- ☐ No
- ☐ Yes. \_\_\_\_\_ child(ren) live in my home

**12. Do you have siblings?**

*If yes, please provide the number of living siblings.*

- ☐ No
- ☐ Yes \_\_\_\_\_ sibling(s)

**13. Are your parents alive?**

*If yes, please detail how many of your parents are still alive.*

- ☐ No
- ☐ Yes \_\_\_\_\_parent(s)

**14. Are you currently employed or self-employed (working for pay)?**

- ☐ No
- ☐ Yes

**15. During the COVID-19 pandemic have you lost your job?**

- ☐ No
- ☐ No, but I started to work from home as a result of the COVID-19 situation
- ☐ Yes, permanently
- ☐ Yes, temporarily

**16. When you compare your financial situation before COVID-19 pandemic and now would you say it has become better worse or remained the**

- ☐ Better
- ☐ The same
- ☐ Worse
- ☐ Do not know

*Skip to question 20 if you answered "no" to question 14*

**17. Are you currently working full-time (e.g., according to your employment contract)?**

- ☐ No. I work part-time: \_\_\_\_\_hours per week.
- ☐ Yes, I work full time: \_\_\_\_\_hours per week.

**18. After any taxes and contributions, what is your average monthly income from employment?**

*Please include any additional or extra or lump sum payment, such as bonuses, 13 month, Christmas or Summer pays.*

- ☐ \_\_\_\_\_ (skip to question 20)
- ☐ I prefer not to answer this question.

**19. Please indicate your monthly income level after taxes and contributions.<sup>1</sup>**

*Please include any additional or extra or lump sum payment, such as bonuses, 13 month, Christmas or Summer pays.*

- ☐ Less than £800
- ☐ Between £800 and 1500
- ☐ Between £1500 and £4000
- ☐ More than £4000
- ☐ Prefer not to answer this question

**20. What is your religion, if any?<sup>2</sup>**

- ☐ Protestant
- ☐ Roman Catholic
- ☐ Eastern Orthodox
- ☐ Islam
- ☐ Jewish
- ☐ Buddhist
- ☐ Hindu
- ☐ Other (specify)
- ☐ I am not religious (skip to question 22)
- ☐ Prefer not to say

**21. What is the importance of religion in your life?**

- ☐ Not important at all
- ☐ Not too important
- ☐ Fairly important
- ☐ Very important

**22. What are your ethnic/family origins?<sup>3</sup>**

*Choose between sections A-E and select only one of the options that best describes your ethnic background.*

**A. European**

- ☐ British or Irish
- ☐ Scandinavian
- ☐ Eastern and Central European
- ☐ Mediterranean

---

<sup>1</sup> The income brackets provided in this question were applied in the UK. Income brackets for other countries were adjusted to reflect differences in average incomes of the population. These values were based on the Survey of Health, Ageing and Retirement in Europe (SHARE).

<sup>2</sup> Question not asked in Italy, Sweden and the Netherlands due to ethical reasons

<sup>3</sup> Question not asked in Italy, Sweden and the Netherlands due to ethical reasons

- ☐ Any other European background, please write in:

**B. Asian**

- ☐ South Asian  
☐ Chinese  
☐ Japanese  
☐ Malaysian, Vietnamese or Filipino  
☐ Any other Asian background, please write in:

**C. Black**

- ☐ Caribbean  
☐ African  
☐ Any other Black background, please write in:

**D. Other ethnic group**

- ☐ Jewish  
☐ Arab  
☐ Other ethnic group, please write in:  
☐ Mixed/Multiple ethnic groups, please write in:  
☐ E. Prefer not to say

**23. How would you describe your national identity?**

I am a national/citizen of:

---

**24. Did you migrate to the country you live in?**

- ☐ No (skip to question 26)  
☐ Yes

**25. In what country were you born?**

---

**26. Did any of your parents migrate to the country you live in?**

- ☐ No (skip to question 29)
- ☐ Yes

**27. In what country was your father born?**

---

**28. In what country was your mother born?**

---

**29. How many people aged 18 or over do you provide informal care for?**

---

**30. Do you have any of the following?**

*Please select all that apply.*

- ☐ A physical impairment or disability
- ☐ Sight or hearing loss
- ☐ A mental health problem or illness
- ☐ A learning disability or difficulty
- ☐ A long-standing illness
- ☐ Multimorbidity
- ☐ Other (please specify)
- ☐ None of the above

**31. Have you been diagnosed with COVID-19?**

- ☐ No
- ☐ Yes, but I was not admitted to a hospital or intensive care unit
- ☐ Yes, and I was admitted to a hospital but not an intensive care unit
- ☐ Yes, and I was admitted to an intensive care unit
- ☐ Prefer not to say

Let's focus on the adult for whom you have been providing the most assistance. From now on, we will refer to the person you care for as "your loved one".

**32. How old is your loved one?**

---

**33. What is the gender of your loved one?**

- ☐ Female
- ☐ Male
- ☐ Non-binary / third gender
- ☐ Prefer to self describe:
- ☐ Prefer not to say

**34. Has your loved one been diagnosed with COVID-19?**

- ☐ No
- ☐ Yes, but they were not admitted to a hospital or intensive care unit
- ☐ Yes, and they were admitted to a hospital but not an intensive care unit
- ☐ Yes, and they were admitted to an intensive care unit
- ☐ Prefer not to say

**35. What health condition(s) has your loved one been diagnosed with?**

*Please select all that apply.*

- ☐ A heart attack including myocardial infarction or coronary thrombosis or any other heart problem including congestive heart failure
- ☐ High blood pressure or hypertension
- ☐ High blood cholesterol
- ☐ A stroke or cerebral vascular disease
- ☐ Diabetes or high blood sugar
- ☐ Chronic lung disease such as chronic bronchitis or emphysema
- ☐ Cancer (please specify the type of cancer if known).
- ☐ Stomach or duodenal ulcer, peptic ulcer
- ☐ Parkinson disease
- ☐ Cataracts
- ☐ Hip fracture
- ☐ Other fractures
- ☐ Alzheimer's disease, dementia, organic brain syndrome, senility or any other serious memory impairment, please specify:
- ☐ Multiple sclerosis
- ☐ Rheumatoid Arthritis
- ☐ Osteoarthritis, or other rheumatism
- ☐ Chronic kidney disease
- ☐ Traumatic brain injury
- ☐ HIV/AIDS
- ☐ Other condition(s) \_\_\_\_\_
- ☐ They have not been diagnosed with any conditions (skip to question 38)

**36. Which one of these health conditions do you think causes the most limitations to your loved one?**



---

**37. How long has your loved one been living with this health condition?**

Years \_\_\_\_\_ Months \_\_\_\_\_

**38. What is your relationship with your loved one?**

- ☐ My loved one is my:
- ☐ spouse / partner
- ☐ mother or father
- ☐ mother-in-law or father-in-law
- ☐ daughter or son
- ☐ grandmother / grandfather
- ☐ sibling
- ☐ another family member
- ☐ friend
- ☐ acquaintance / neighbour / other non-relative
- ☐ Other, please specify below.

**39. Do you share a household with your loved one?**

- ☐ No
- ☐ Yes (skip to question 46)

**40. Where does your loved one live?**

- ☐ In their own home
- ☐ In someone else's home
- ☐ In an assisted living facility or other residential setting where some care is provided
- ☐ In a nursing care or long-term care facility (skip to question 42)

**41. Indicate the option that best describes your loved one's living arrangement:**

*Please select all that apply.*

- ☐ Alone
- ☐ With their children
- ☐ With their partner
- ☐ With paid carers
- ☐ With others, please specify

**42. Which city/town does your loved one live in?**

---

**43. Is the place where your loved one lives, located in a:**

- ☐ central city/area
- ☐ peripheral area in the city
- ☐ rural area

**44. How do you reach the place where your loved one lives?**

- ☐ I walk to their home
- ☐ I cycle to their home
- ☐ I drive to their home
- ☐ I use public transportation (bus or train)
- ☐ If Other, please specify

**45. How far is your home from the place where your loved one lives?**

- ☐ less than 15 minutes
- ☐ 15 to 30 minutes
- ☐ 30 to 60 minutes
- ☐ 60 to 90 minutes
- ☐ 90 to 120 minutes
- ☐ More than 120 minutes

**46. Inclusion of Other in the Self Scale (IOS) (Aron et al., 1992)**

Below there are seven pairs of circles: the level of overlap between the circles indicates how close you feel to your loved one. The greater the overlap, the closer you feel to your loved one. Please indicate the picture that best describes your relationship with your loved one.

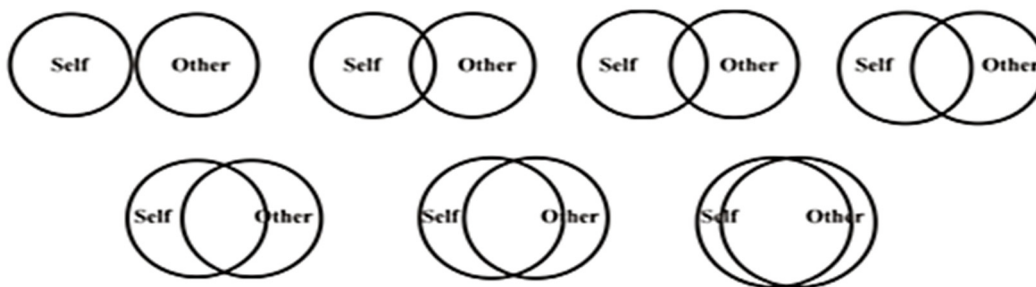

**47. Does your loved one have any difficulty with these activities? (Katz, 1983)**

*Please select all that apply.*

- ☐ Dressing, including putting on shoes and socks
- ☐ Walking across a room
- ☐ Bathing or showering
- ☐ Eating, such as cutting up their food
- ☐ Getting in or out of bed
- ☐ Using the toilet, including getting up or down

☐ None of these

**48. How long have you been providing informal care to your loved one?**

*Informal care is any care or help provided to older people (family or otherwise), working age adults, and young people and children with disability as well as people living with mental health problems. Please note, this does not include care provided by paid care professionals.*

- ☐ Less than a month: \_\_\_\_\_ week(s).  
☐ Less than a year: \_\_\_\_\_ month(s).  
☐ More than a year: \_\_\_\_\_ year(s).

**Please fill in the following 4 questions in relation to the last week OR on a typical week if last week was a holiday, or if you were away, or ill, etc.**

A limit of 126 hours has been set for the number of hours of care that you provide each week. The purpose of this limit is not to undervalue or underestimate the care that you provide. This limit has been set to allow you time (6 hours per day) for basic needs such as resting/sleeping and doing non-care related tasks.

**49. During the last week, on how many days did you provide care to your loved one?**

- ☐ 0 days  
☐ 1 day  
☐ 2 days  
☐ 3 days  
☐ 4 days  
☐ 5 days  
☐ 6 days  
☐ 7 days

**50. During the last week, how much time did you spend on household activities and tasks that you would not have had to perform if your loved one was in good health, or if they could have done them independently?**

*For example preparing food, cleaning, washing, ironing, sewing, shopping, and gardening.*

\_\_\_\_\_ hours per week.

**51. During the last week, how much time did you spend helping your loved one with their personal care?**

*For example dressing/undressing, washing/showering/bathing, hair care, shaving and grooming, and going to the toilet.*

\_\_\_\_\_ hours per week.

**52. During the last week, how much time did you spend providing practical support to your loved one that would not have had to be performed if they were in good health, or if they could have done it independently?**

*For example eating and drinking, moving inside or outside the house (including assistance with walking or using a wheelchair), visiting family or friends, accompany to healthcare visits (e.g. doctor appointments), filling prescriptions at the pharmacy, help taking medications, and taking care of financial matters (e.g. paying the bills or managing healthcare insurance).*

\_\_\_\_\_ hours per week.

**53. During the last week, how much time did you spend on providing emotional support to your loved one that would not have had to be provided**

*For example help to cope with pain, disability, and discomfort, anxiety, worry, and loneliness.*

\_\_\_\_\_ hours per week.

**54. Due to COVID-19 the hours of emotional support you provide have:**

- ☐ Increased by \_\_\_\_\_ hour(s) per week
- ☐ Decreased by \_\_\_\_\_ hour(s) per week
- ☐ Stayed the same

**55. Due to COVID-19 the hours of practical support you provide have:**

- ☐ Increased by \_\_\_\_\_ hour(s) per week
- ☐ Decreased by \_\_\_\_\_ hour(s) per week
- ☐ Stayed the same

**56. Due to COVID-19 the hours of personal care you provide have:**

- ☐ Increased by \_\_\_\_\_ hour(s) per week
- ☐ Decreased by \_\_\_\_\_ hour(s) per week
- ☐ Stayed the same

**57. Besides your care or support, does she/he also receive care from other informal caregivers?**

- ☐ No, I am the only informal caregiver (skip to question 60)
- ☐ Yes, from \_\_\_\_\_ [number] other informal caregivers

**58. In the past week, how many hours of care did these informal caregiver(s) provide for your loved one?**

- ☐ They have not provided any care.
- ☐ They have provided hours of care.
- ☐ Do not know

**59. Do you consider yourself to be the person who provides most of the informal care for your loved one?**

- ☐ No
- ☐ Yes (skip to question 61)

**60. Who would you consider to be the person who provides most of the informal care for your loved one? Their:**

- ☐ Spouse / Partner
- ☐ Child
- ☐ Parent
- ☐ Sibling
- ☐ Daughter- / Son-in-law
- ☐ Uncle / Aunt
- ☐ Nephew/ Niece
- ☐ Cousin
- ☐ Friend
- ☐ Neighbour
- ☐ Other, please specify

**61. Have you previously provided informal care for another person?**

- ☐ No
- ☐ Yes

Now we want to ask you about the services that your loved one may have received from paid care worker(s), sitting services and overnight care.

**62. Over the past three months, has your loved one been provided with home care also by one or more paid care workers?**

- ☐ No (skip to question 73)
- ☐ Yes

**63. How many paid care workers are involved with your loved one's home care?**

- ☐ 1
- ☐ 2 (skip to question 69)
- ☐ 3 (skip to question 69)
- ☐ 4 (skip to question 69)
- ☐ More than 4 (skip to question 69)

**64. Was the paid worker a migrant care worker?**

"Migrant worker" refers to a person who is employed in a country that they migrated to. This includes not only people who migrated for the purpose of employment, but also those who migrated for other reasons (eg., family or education) and then gained employment at a later date.

- ☐ No (skip to question 67)
- ☐ Yes
- ☐ Do not know (skip to question 67)

**65. Please fill in the follow table based on the situation of the migrant care worker**

| Employed on a live-in basis? | Gender                   | Age         | Level of education                                                                          | Marital status                        |
|------------------------------|--------------------------|-------------|---------------------------------------------------------------------------------------------|---------------------------------------|
| No                           | Female                   | 18-24       | Primary                                                                                     | Single (never married)                |
| Yes                          | Male                     | 25-34       | Secondary                                                                                   | Married                               |
|                              | Non-binary /third gender | 35-44       | Post-secondary vocational education (e.g., further education college, apprenticeships etc.) | In a civil union/domestic partnership |
|                              | Do not know              | 45-54       | Post secondary academic education (e.g., university)                                        | Divorced                              |
|                              |                          | 55-64       | Not listed or other                                                                         | Widowed                               |
|                              |                          | 65-74       | Do not know                                                                                 | Do not know                           |
|                              |                          | 75+         |                                                                                             |                                       |
|                              |                          | Do not know |                                                                                             |                                       |

**66. What is the nationality of the migrant care worker?**

They are a national/citizen of:

\_\_\_\_\_

*Skip to question 73 if you answered "yes" to question 64*

**67. Please fill in the follow table based on the situation of the paid care worker**

| Employed on a live-in basis? | Gender                   | Age         | Level of education                                                                          | Marital status                        |
|------------------------------|--------------------------|-------------|---------------------------------------------------------------------------------------------|---------------------------------------|
| No                           | Female                   | 18-24       | Primary                                                                                     | Single (never married)                |
| Yes                          | Male                     | 25-34       | Secondary                                                                                   | Married                               |
|                              | Non-binary /third gender | 35-44       | Post-secondary vocational education (e.g., further education college, apprenticeships etc.) | In a civil union/domestic partnership |
|                              | Do not know              | 45-54       | Post secondary academic education (e.g., university)                                        | Divorced                              |
|                              |                          | 55-64       | Not listed or other                                                                         | Widowed                               |
|                              |                          | 65-74       | Do not know                                                                                 | Do not know                           |
|                              |                          | 75+         |                                                                                             |                                       |
|                              |                          | Do not know |                                                                                             |                                       |

**68. Does the paid care worker have a migration background?**

*"Migration background" refers to a person who has:*

- (a) migrated into their present country of residence; and/or*
- (b) previously had a different nationality from their present country of residence; and / or*
- (c) at least one of their parents previously entered their present country of residence as a migrant.*

- ☐ No
- ☐ Yes
- ☐ Do not know

Skip to question 73 if you answered “no” or “do not know” to question 64

**69. Were any of these paid workers a migrant worker?**

*“Migrant worker” refers to a person who is employed in a country that they migrated to. This includes not only people who migrated for the purpose of employment, but also those who migrated for other reasons (eg., family or education) and then gained employment at a later date.*

- ☐ No (skip to question 72)
- ☐ Yes
- ☐ Do not know (skip to question 72)

**70. Please fill in a separate row in the table for each individual worker. "Migration background" refers to a person who has:**

- (a) *migrated into their present country of residence; and/or*
- (b) *previously had a different nationality from their present country of residence; and / or*
- (c) *at least one of their parents previously entered their present country of residence as a migrant.*

|                  | Employed on a live-in basis? | Migrant worker? | Migration background ? | Gender                   | Age                               | Level of education                                                                          | Marital status                        |
|------------------|------------------------------|-----------------|------------------------|--------------------------|-----------------------------------|---------------------------------------------------------------------------------------------|---------------------------------------|
| Care worker n. 1 | No                           | No              | No                     | Female                   | 18-24                             | Primary                                                                                     | Single (never married)                |
|                  | Yes                          | Yes             | Yes                    | Male                     | 25-34                             | Secondary                                                                                   | Married                               |
|                  |                              | Do not know     | Do not know            | Non-binary /third gender | 35-44                             | Post-secondary vocational education (e.g., further education college, apprenticeships etc.) | In a civil union/domestic partnership |
|                  |                              |                 |                        | Do not know              | 45-54                             |                                                                                             | Divorced                              |
|                  |                              |                 |                        |                          | 55-64                             |                                                                                             | Widowed                               |
|                  |                              |                 |                        |                          | 65-74                             |                                                                                             | Do not know                           |
|                  |                              |                 |                        | 75+                      | Post secondary academic education |                                                                                             |                                       |
|                  |                              |                 |                        | Do not know              |                                   |                                                                                             |                                       |



|                  |               |                                  |                                  |                                                                       |                                                                                                      |                                                                                                                                                                                                                   |                                                                                                                                      |
|------------------|---------------|----------------------------------|----------------------------------|-----------------------------------------------------------------------|------------------------------------------------------------------------------------------------------|-------------------------------------------------------------------------------------------------------------------------------------------------------------------------------------------------------------------|--------------------------------------------------------------------------------------------------------------------------------------|
|                  |               |                                  |                                  |                                                                       |                                                                                                      | (e.g., university)<br><br>Not listed or other<br><br>Do not know                                                                                                                                                  |                                                                                                                                      |
| Care worker n. 2 | No<br><br>Yes | No<br><br>Yes<br><br>Do not know | No<br><br>Yes<br><br>Do not know | Female<br><br>Male<br><br>Non-binary /third gender<br><br>Do not know | 18-24<br><br>25-34<br><br>35-44<br><br>45-54<br><br>55-64<br><br>65-74<br><br>75+<br><br>Do not know | Primary<br>Secondary<br>Post-secondary vocational education (e.g., further education college, apprenticeships etc.)<br>Post secondary academic education (e.g., university)<br>Not listed or other<br>Do not know | Single (never married)<br><br>Married<br><br>In a civil union/domestic partnership<br><br>Divorced<br><br>Widowed<br><br>Do not know |
| Care worker n. 3 | No<br><br>Yes | No<br><br>Yes<br><br>Do not know | No<br><br>Yes<br><br>Do not know | Female<br><br>Male<br><br>Non-binary /third gender<br><br>Do not know | 18-24<br>25-34<br>35-44<br>45-54<br>55-64<br>65-74<br>75+<br>Do not know                             | Primary<br><br>Secondary<br><br>Post-secondary vocational education (e.g., further education college, apprenticeships etc.)<br><br>Post secondary academic education                                              | Single (never married)<br><br>Married<br><br>In a civil union/domestic partnership<br><br>Divorced<br><br>Widowed<br><br>Do not know |

|                  |               |                                  |                                  |                                                                       |                                                                                                      |                                                                                                                                                                                                                                       |                                                                                                                                      |
|------------------|---------------|----------------------------------|----------------------------------|-----------------------------------------------------------------------|------------------------------------------------------------------------------------------------------|---------------------------------------------------------------------------------------------------------------------------------------------------------------------------------------------------------------------------------------|--------------------------------------------------------------------------------------------------------------------------------------|
|                  |               |                                  |                                  |                                                                       |                                                                                                      | (e.g., university)<br><br>Not listed or other<br><br>Do not know                                                                                                                                                                      |                                                                                                                                      |
| Care worker n. 4 | No<br><br>Yes | No<br><br>Yes<br><br>Do not know | No<br><br>Yes<br><br>Do not know | Female<br><br>Male<br><br>Non-binary /third gender<br><br>Do not know | 18-24<br><br>25-34<br><br>35-44<br><br>45-54<br><br>55-64<br><br>65-74<br><br>75+<br><br>Do not know | Primary<br><br>Secondary<br><br>Post-secondary vocational education (e.g., further education college, apprenticeships etc.)<br><br>Post secondary academic education (e.g., university)<br><br>Not listed or other<br><br>Do not know | Single (never married)<br><br>Married<br><br>In a civil union/domestic partnership<br><br>Divorced<br><br>Widowed<br><br>Do not know |

**71. What is the nationality of the migrant care worker(s)?**

They are a national/citizen of:

Care worker n. 1 \_\_\_\_\_

Care worker n. 2 \_\_\_\_\_

Care worker n. 3 \_\_\_\_\_

Care worker n. 4 \_\_\_\_\_

Skip to question 73 if you answered “yes” to question 69

**72. Please fill in a separate row in the table for each individual worker. "Migration background" refers to a person who has:**

- (a) *migrated into their present country of residence; and/or*
- (b) *previously had a different nationality from their present country of residence; and / or*
- (c) *at least one of their parents previously entered their present country of residence as a migrant.*

|                  | Employed on a live-in basis? | Migration background? | Gender                   | Age         | Level of education                                                                          | Marital status                        |
|------------------|------------------------------|-----------------------|--------------------------|-------------|---------------------------------------------------------------------------------------------|---------------------------------------|
| Care worker n. 1 | No                           | No                    | Female                   | 18-24       | Primary                                                                                     | Single (never married)                |
|                  | Yes                          | Yes                   | Male                     | 25-34       | Secondary                                                                                   |                                       |
|                  |                              | Do not know           | Non-binary /third gender | 35-44       | Post-secondary vocational education (e.g., further education college, apprenticeships etc.) | Married                               |
|                  |                              |                       |                          | 45-54       |                                                                                             | In a civil union/domestic partnership |
|                  |                              |                       |                          | 55-64       |                                                                                             |                                       |
|                  |                              |                       |                          | 65-74       |                                                                                             |                                       |
|                  |                              |                       | Do not know              | 75+         |                                                                                             | Divorced                              |
|                  |                              |                       |                          | Do not know | Post secondary academic education (e.g., university)                                        | Widowed                               |
|                  |                              |                       |                          |             | Not listed or other                                                                         | Do not know                           |
|                  |                              |                       |                          |             | Do not know                                                                                 |                                       |
| Care worker n. 2 | No                           | No                    | Female                   | 18-24       | Primary                                                                                     | Single (never married)                |
|                  | Yes                          | Yes                   | Male                     | 25-34       | Secondary                                                                                   |                                       |
|                  |                              | Do not know           |                          |             | Post-secondary vocational education                                                         |                                       |

|                  |               |                                  |                                                                       |                                                                          |                                                                                                                                                                                                                                        |                                                                                                                                      |
|------------------|---------------|----------------------------------|-----------------------------------------------------------------------|--------------------------------------------------------------------------|----------------------------------------------------------------------------------------------------------------------------------------------------------------------------------------------------------------------------------------|--------------------------------------------------------------------------------------------------------------------------------------|
|                  |               |                                  | Non-binary /third gender<br><br>Do not know                           | 35-44<br>45-54<br>55-64<br>65-74<br>75+<br>Do not know                   | (e.g., further education college, apprentices hips etc.)<br>Post secondary academic education (e.g., university)<br>Not listed or other<br>Do not know                                                                                 | Married<br><br>In a civil union/domestic partnership<br><br>Divorced<br><br>Widowed<br><br>Do not know                               |
| Care worker n. 3 | No<br><br>Yes | No<br><br>Yes<br><br>Do not know | Female<br><br>Male<br><br>Non-binary /third gender<br><br>Do not know | 18-24<br>25-34<br>35-44<br>45-54<br>55-64<br>65-74<br>75+<br>Do not know | Primary<br><br>Secondary<br><br>Post-secondary vocational education (e.g., further education college, apprentices hips etc.)<br><br>Post secondary academic education (e.g., university)<br><br>Not listed or other<br><br>Do not know | Single (never married)<br><br>Married<br><br>In a civil union/domestic partnership<br><br>Divorced<br><br>Widowed<br><br>Do not know |
| Care worker n. 4 | No<br><br>Yes | No<br><br>Yes<br><br>Do not know | Female<br><br>Male                                                    | 18-24<br><br>25-34                                                       | Primary<br><br>Secondary                                                                                                                                                                                                               | Single (never married)                                                                                                               |

|  |  |  |                          |             |                                                                                             |                                       |
|--|--|--|--------------------------|-------------|---------------------------------------------------------------------------------------------|---------------------------------------|
|  |  |  | Non-binary /third gender | 35-44       | Post-secondary vocational education (e.g., further education college, apprenticeships etc.) | Married                               |
|  |  |  | Do not know              | 45-54       |                                                                                             | In a civil union/domestic partnership |
|  |  |  |                          | 55-64       |                                                                                             | Divorced                              |
|  |  |  |                          | 65-74       |                                                                                             | Widowed                               |
|  |  |  |                          | 75+         |                                                                                             | Do not know                           |
|  |  |  |                          | Do not know | Post secondary academic education (e.g., university)                                        |                                       |
|  |  |  |                          |             | Not listed or other                                                                         |                                       |
|  |  |  |                          |             | Do not know                                                                                 |                                       |

**73. Besides your care or support, does your loved one visit a daycare facility or a residential or nursing home?**

- ☐ No
- ☐ Yes, for \_\_\_\_ hour(s) during the last week.

*The next questions will ask about the services that you, the caregiver, may have used.*

**74. Have you received any of the following services in the past six months?**

- ☐ Information about the disease that the loved one has.
- ☐ Coordination services providing information and advice about the type of help, support and benefits that is available to carers and how to access it (e.g. information centers, case (or care) managers, advice or guidance from a physician or social worker.
- ☐ Training to help carers develop the skills they need to care and cope with the burden of care
- ☐ Counselling (i.e. supportive and social counselling, etc.).
- ☐ Self-help or support group
- ☐ Formal standardized assessment of your needs or caring situation
- ☐ Reconciliation of caring and employment (e.g. flexible work arrangements and paid and/or unpaid care leaves from work).

- ☐ In-home respite care (temporary or short-term care provided at home to give rest or relief to informal caregivers from the tasks of caregiving).
- ☐ Out-of-home respite care (e.g. day-care services and temporary stay at a residential or nursing home).
- ☐ None of them (skip to question 79)

*For question 75 and 76, only complete the options that correspond to the options you selected in question 74.*

**75. In a typical month, how many times do you use the following service(s)?**

- ☐ Information about the disease that the loved one has \_\_\_\_\_
- ☐ Coordination services providing information and advice about the type of help, support and benefits that is available to carers and how to access it (e.g. information centers, case (or care) managers, advice or guidance from a physician or social worker)  
\_\_\_\_\_
- ☐ Training to help carers develop the skills they need to care and cope with the burden of care. \_\_\_\_\_
- ☐ Counselling (i.e. supportive and social counselling, etc.) \_\_\_\_\_
- ☐ Self-help or support group \_\_\_\_\_
- ☐ In-home respite care (temporary or short-term care provided at home to give rest or relief to informal caregivers from the tasks of caregiving) \_\_\_\_\_
- ☐ Out-of-home respite care (e.g. day-care services and temporary stay at a residential or nursing home). \_\_\_\_\_

**76. Which of these services have you received online?**

*Please select all that apply.*

- ☐ Information about the disease that the loved one has.
- ☐ Coordination services providing information and advice about the type of help, support and benefits that is available to carers and how to access it (e.g. information centers, case (or care) managers, advice or guidance from a physician or social worker).
- ☐ Training to help carers develop the skills they need to care and cope with the burden of care.
- ☐ Counselling (i.e. supportive and social counselling, etc.).
- ☐ Self-help or support group.
- ☐ None

**77. Given the COVID-19 situation, do you still have access to the usual support services you receive as a caregiver?**

- ☐ No (skip to question 79)
- ☐ Yes (skip to question 79)
- ☐ Yes, but I have to receive some of these services online due to COVID-19

**78. Please indicate which of the following services you receive online due to COVID-19:**

*Please select all that apply.*

- ☐ Information about the disease that the loved one has.
- ☐ Coordination services providing information and advice about the type of help, support and benefits that is available to carers and how to access it (e.g. information centers, case (or care) managers, advice or guidance from a physician or social worker).
- ☐ Training to help carers develop the skills they need to care and cope with the burden of care.
- ☐ Counselling (i.e. supportive and social counselling, etc.).
- ☐ Self-help or support group.
- ☐ If Other please specify

**79. Do you receive any of the following benefits because of your caregiving role?**

- **Cash benefits (e.g. carer allowance, carer's benefit, care wage, cash for care, paid kin caregiver, bonuses, etc)**

- ☐ No
- ☐ Yes. I receive \_\_\_\_\_ per month.

- **Financial compensation during care leave (e.g. care-leave benefits, career break compensation, family hospice leave grant, income replace**

- ☐ No
- ☐ Yes. I receive \_\_\_\_\_ per month.

- **Tax benefits such as exemptions, deductions, and credits (e.g. council tax reduction, deductions from income tax, etc.)**

- ☐ No
- ☐ Yes

- **Coverage of social or pension contributions (e.g. contributions are wholly or partly paid by the government or insurance).**

- ☐ No
- ☐ Yes

- **Carer/caregiver credits (i.e. pension credits received for providing care).**

- ☐ No  
☐ Yes

- **Health insurance**

- ☐ No  
☐ Yes

#### **80. Motivations in Elder Care Scale (MECS) (Lyonette & Yardley, 2003)**

The following statements describe some of the reasons why people begin caring for a relative or friend. Please answer each question by choosing the option which best describes your own situation.

|                                                                         | Strongly disagree | Disagree | Neither agree or disagree | Agree | Strongly agree |
|-------------------------------------------------------------------------|-------------------|----------|---------------------------|-------|----------------|
| I felt that I had no choice but to care for my loved one:               |                   |          |                           |       |                |
| I would feel guilty if I didn't care for the loved one:                 |                   |          |                           |       |                |
| The loved one expected me to care for them:                             |                   |          |                           |       |                |
| I felt that people would disapprove if I didn't care for the loved one: |                   |          |                           |       |                |
| It's part of my nature to care for others:                              |                   |          |                           |       |                |
| I felt it was my duty to care for the loved one:                        |                   |          |                           |       |                |
| I wanted to make sure the loved one was safe:                           |                   |          |                           |       |                |
| Caring for the loved one was an automatic decision:                     |                   |          |                           |       |                |
| I do not/did not want the loved one to go into a home:                  |                   |          |                           |       |                |
| I wanted to provide care for the loved one myself:                      |                   |          |                           |       |                |
| Caring for the loved one is a way of living up to my principles:        |                   |          |                           |       |                |



|                                                            |  |  |  |  |  |
|------------------------------------------------------------|--|--|--|--|--|
| The loved one was gradually becoming more dependent on me: |  |  |  |  |  |
| I felt that I had a responsibility towards the loved one:  |  |  |  |  |  |

### 81. Partner-Specific Communal Motivation scale (CMS) (Lemay & Neal, 2013)

Keeping in mind your loved one, indicate the extent to which each statement applies to you.

|                                                             | Not at all <span style="float: right;">Extremely</span> |   |   |   |   |   |   |   |   |
|-------------------------------------------------------------|---------------------------------------------------------|---|---|---|---|---|---|---|---|
| Helping my loved one is a high priority for me.             | 1                                                       | 2 | 3 | 4 | 5 | 6 | 7 | 8 | 9 |
| I could easily put my loved one's needs out of my thoughts. | 1                                                       | 2 | 3 | 4 | 5 | 6 | 7 | 8 | 9 |
| I care for my loved one.                                    | 1                                                       | 2 | 3 | 4 | 5 | 6 | 7 | 8 | 9 |
| I care about my loved one's well-being.                     | 1                                                       | 2 | 3 | 4 | 5 | 6 | 7 | 8 | 9 |
| I could easily accept not helping my loved one.             | 1                                                       | 2 | 3 | 4 | 5 | 6 | 7 | 8 | 9 |
| I would sacrifice very much to help my loved one.           | 1                                                       | 2 | 3 | 4 | 5 | 6 | 7 | 8 | 9 |
| I would incur a large cost in order to help my loved one.   | 1                                                       | 2 | 3 | 4 | 5 | 6 | 7 | 8 | 9 |
| I care for my loved one's needs.                            | 1                                                       | 2 | 3 | 4 | 5 | 6 | 7 | 8 | 9 |
| I would go out of my way to help my loved one.              | 1                                                       | 2 | 3 | 4 | 5 | 6 | 7 | 8 | 9 |
| I would be reluctant to sacrifice for my loved one.         | 1                                                       | 2 | 3 | 4 | 5 | 6 | 7 | 8 | 9 |

### 82. Willingness to care scale (WTC) (Abell, 2001)

Caregiving can be a demanding and sometimes overwhelming experience. Caregivers may differ in the tasks they feel able and/or willing to perform.

Being able to perform a task means that you believe you could do it if necessary. Being willing to perform a task means that you feel you would do it if it had to be done.

For example: I am able to change soiled sheets but I would not be completely willing to do so.

As you read the statements below, think about your loved one.

First, choose yes for each one of the tasks you feel able to do for your loved one. Second, reread the items, and choose the option which best shows how willing you are to do each one.

|                                                                      | Able?<br>(No/Yes) | How willing? |   |   |   |   |
|----------------------------------------------------------------------|-------------------|--------------|---|---|---|---|
| Listen to your loved one when they are sad.                          |                   | 1            | 2 | 3 | 4 | 5 |
| Comfort your loved one when they are upset.                          |                   | 1            | 2 | 3 | 4 | 5 |
| Help your loved one deal with anxiety about the future.              |                   | 1            | 2 | 3 | 4 | 5 |
| Hold hands when your loved one is afraid.                            |                   | 1            | 2 | 3 | 4 | 5 |
| Encourage your loved one when they feel hopeless.                    |                   | 1            | 2 | 3 | 4 | 5 |
| Listen to your loved one's concerns about death or dying.            |                   | 1            | 2 | 3 | 4 | 5 |
| Help keep your loved one's spirits up.                               |                   | 1            | 2 | 3 | 4 | 5 |
| Hold your loved one when they are crying.                            |                   | 1            | 2 | 3 | 4 | 5 |
| Listen to your loved one when they are angry.                        |                   | 1            | 2 | 3 | 4 | 5 |
| Be patient when your loved one is disoriented or confused.           |                   | 1            | 2 | 3 | 4 | 5 |
| Take your loved one to a medical appointment.                        |                   | 1            | 2 | 3 | 4 | 5 |
| Bring home the groceries for your loved one.                         |                   | 1            | 2 | 3 | 4 | 5 |
| Help pay for your loved one's medicine.                              |                   | 1            | 2 | 3 | 4 | 5 |
| Prepare meals for your loved one.                                    |                   | 1            | 2 | 3 | 4 | 5 |
| Clean your loved one's room or home.                                 |                   | 1            | 2 | 3 | 4 | 5 |
| Wash your loved one's dishes.                                        |                   | 1            | 2 | 3 | 4 | 5 |
| Do your loved one's laundry.                                         |                   | 1            | 2 | 3 | 4 | 5 |
| Help pay for your loved one's food or housing.                       |                   | 1            | 2 | 3 | 4 | 5 |
| Have your loved one live in your home.                               |                   | 1            | 2 | 3 | 4 | 5 |
| Negotiate your loved one's health care options with a doctor.        |                   | 1            | 2 | 3 | 4 | 5 |
| Help your loved one take medicine.                                   |                   | 1            | 2 | 3 | 4 | 5 |
| Change your loved one's dirty bed sheets.                            |                   | 1            | 2 | 3 | 4 | 5 |
| Help your loved one take a bath.                                     |                   | 1            | 2 | 3 | 4 | 5 |
| Clean up after your loved one who has lost bowel or bladder control. |                   | 1            | 2 | 3 | 4 | 5 |
| Help your loved one eat a meal.                                      |                   | 1            | 2 | 3 | 4 | 5 |
| Clean up when your loved one has thrown up.                          |                   | 1            | 2 | 3 | 4 | 5 |
| Turn your loved one in bed.                                          |                   | 1            | 2 | 3 | 4 | 5 |

|                                             |  |   |   |   |   |   |
|---------------------------------------------|--|---|---|---|---|---|
| Change dressings on your loved one's sores. |  | 1 | 2 | 3 | 4 | 5 |
| Help your loved one in the bathroom.        |  | 1 | 2 | 3 | 4 | 5 |
| Help your loved one move in and out of bed. |  | 1 | 2 | 3 | 4 | 5 |

**83. Have your thoughts and feelings about COVID-19 influenced how you feel about caregiving in terms of your willingness to care?**

- ☐ Yes, I feel more willing to provide care for my loved one
- ☐ Yes, I feel less willing to provide care for my loved one
- ☐ No

**84. The World Health Organisation-Five Well-Being Index (WHO-5)**

|   | <i>Over the last two weeks</i>                             | All of the time | Most of the time | More than half of the time | Less than half of the time | Some of the time | At no time |
|---|------------------------------------------------------------|-----------------|------------------|----------------------------|----------------------------|------------------|------------|
| 1 | I have felt cheerful and in good spirits                   | 5               | 4                | 3                          | 2                          | 1                | 0          |
| 2 | I have felt calm and relaxed                               | 5               | 4                | 3                          | 2                          | 1                | 0          |
| 3 | I have felt active and vigorous                            | 5               | 4                | 3                          | 2                          | 1                | 0          |
| 4 | I woke up feeling fresh and rested                         | 5               | 4                | 3                          | 2                          | 1                | 0          |
| 5 | My daily life has been filled with things that interest me | 5               | 4                | 3                          | 2                          | 1                | 0          |

**85. Caregiver GAINS scale (Pearlin, 1988)**

As a result of providing care, to what extent did you:

|                                                     | A lot | Somewhat | A little | Not at all |
|-----------------------------------------------------|-------|----------|----------|------------|
| Become more sensitive to persons with disabilities? |       |          |          |            |
| Get a better idea of what's important in life?      |       |          |          |            |
| Become aware of inner strengths?                    |       |          |          |            |

|                                  |  |  |  |  |
|----------------------------------|--|--|--|--|
| Become closer to God?            |  |  |  |  |
| Grow as a person?                |  |  |  |  |
| Become closer to family?         |  |  |  |  |
| Gain a sense of fulfilling duty? |  |  |  |  |
| Become more self confident?      |  |  |  |  |
| Learn to do new things?          |  |  |  |  |
| Make new friends?                |  |  |  |  |

#### 86. Zarit Burden Interview (ZBI-12) (Bedard et al., 2001)

The following is a list of statements which reflect how people sometimes feel when taking care of their loved one.

Do you feel...

|                                                                             | Never | Rarely | Sometimes | Quite frequently | Nearly always |
|-----------------------------------------------------------------------------|-------|--------|-----------|------------------|---------------|
| That because of the time you spend with your loved one that you don't have  |       |        |           |                  |               |
| Stressed between caring for your loved one and trying to meet other         |       |        |           |                  |               |
| Angry when you are around your loved one?                                   |       |        |           |                  |               |
| That your loved one currently affects your relationship with family members |       |        |           |                  |               |
| Strained when you are around your loved one?                                |       |        |           |                  |               |
| That your health has suffered because of your involvement with your loved   |       |        |           |                  |               |
| That you don't have as much privacy as you                                  |       |        |           |                  |               |

|                                                                          |  |  |  |  |  |
|--------------------------------------------------------------------------|--|--|--|--|--|
| would like because of your                                               |  |  |  |  |  |
| That your social life has suffered because you are caring for your loved |  |  |  |  |  |
| That you have lost control of your life since your loved one's illness?  |  |  |  |  |  |
| Uncertain about what to do about your loved one?                         |  |  |  |  |  |
| You should be doing more for your loved one?                             |  |  |  |  |  |
| You could do a better job in caring for your loved one?                  |  |  |  |  |  |

#### 87. EQ-5D-5L

**Please select the ONE box that best describes your health TODAY.**

##### MOBILITY

- ☐ I have no problems in walking about
- ☐ I have slight problems in walking about
- ☐ I have moderate problems in walking about
- ☐ I have severe problems in walking about
- ☐ I am unable to walk about

**Please select the ONE box that best describes your health TODAY.**

##### SELF-CARE

- ☐ I have no problems washing or dressing myself
- ☐ I have slight problems washing or dressing myself
- ☐ I have moderate problems washing or dressing myself
- ☐ I have severe problems washing or dressing myself
- ☐ I am unable to wash or dress myself

**Please select the ONE box that best describes your health TODAY.**

USUAL ACTIVITIES (e.g. work, study, housework, family or leisure activities)

- ☐ I have no problems doing my usual activities
- ☐ I have slight problems doing my usual activities
- ☐ I have moderate problems doing my usual activities
- ☐ I have severe problems doing my usual activities
- ☐ I am unable to do my usual activities

**Please select the ONE box that best describes your health TODAY.**

PAIN / DISCOMFORT

- ☐ I have no pain or discomfort
- ☐ I have slight pain or discomfort
- ☐ I have moderate pain or discomfort
- ☐ I have severe pain or discomfort
- ☐ I have extreme pain or discomfort

**Please select the ONE box that best describes your health TODAY.**

ANXIETY / DEPRESSION

- ☐ I am not anxious or depressed
- ☐ I am slightly anxious or depressed
- ☐ I am moderately anxious or depressed
- ☐ I am severely anxious or depressed
- ☐ I am extremely anxious or depressed

**88. VAS**

**We would like to know how good or bad your health is TODAY.**

This scale is numbered from 0 to 100.

100 means the best health you can imagine. 0 means the worst health you can imagine.

Please indicate on the scale how your health is TODAY.

Best  
imaginable

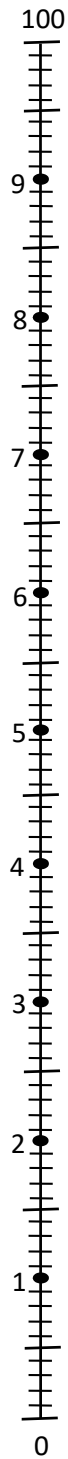

Worst  
imaginable

**89. 10-item Center for Epidemiologic Studies Depression Scale (CESD-10 )** (Andersen et al., 1994)

Below is a list of the ways you might have felt or behaved. Please indicate how often you have felt this way during the past week.

|                                                       | <b>Rarely or none<br/>of the time<br/>(less than 1 day)</b> | <b>Some or a<br/>little of the<br/>time (1-2<br/>days)</b> | <b>Occasionally<br/>or a<br/>moderate<br/>amount of<br/>time (3-4<br/>days)</b> | <b>All of the<br/>time (5-7<br/>days)</b> |
|-------------------------------------------------------|-------------------------------------------------------------|------------------------------------------------------------|---------------------------------------------------------------------------------|-------------------------------------------|
| I was bothered by things that usually don't bother me |                                                             |                                                            |                                                                                 |                                           |
| I had trouble keeping my mind on what I was doing     |                                                             |                                                            |                                                                                 |                                           |
| I felt depressed                                      |                                                             |                                                            |                                                                                 |                                           |
| I felt that everything I did was an effort            |                                                             |                                                            |                                                                                 |                                           |
| I felt hopeful about the future                       |                                                             |                                                            |                                                                                 |                                           |
| I felt fearful                                        |                                                             |                                                            |                                                                                 |                                           |
| My sleep was restless                                 |                                                             |                                                            |                                                                                 |                                           |
| I was happy                                           |                                                             |                                                            |                                                                                 |                                           |
| I felt lonely                                         |                                                             |                                                            |                                                                                 |                                           |
| I could not "get going"                               |                                                             |                                                            |                                                                                 |                                           |

**90. Dyadic Relationship Scale (DRS)** (Sebern et al. 2007)

This series of questions address some of the difficulties that people face as they care for a relative. We would like to know how helping your loved one has affected your relationship with them during the past week. How much do you agree or disagree with the following statements?

| <b>Because of helping my loved one:</b>               | <b>Strongly<br/>agree</b> | <b>Agree</b> | <b>Neutral</b> | <b>Disagree</b> | <b>Strongly<br/>disagree</b> |
|-------------------------------------------------------|---------------------------|--------------|----------------|-----------------|------------------------------|
| I felt closer to my loved one than I have in a while. |                           |              |                |                 |                              |
| I have learned some good things about my loved one.   |                           |              |                |                 |                              |



|                                                                           |  |  |  |  |  |
|---------------------------------------------------------------------------|--|--|--|--|--|
| I felt angry toward my loved one.                                         |  |  |  |  |  |
| I felt depressed because of my relationship with my loved one.            |  |  |  |  |  |
| I felt resentful toward my loved one.                                     |  |  |  |  |  |
| I have had more patience than I have had in the past.                     |  |  |  |  |  |
| I have learned some good things about myself.                             |  |  |  |  |  |
| I felt that my relationship with my loved one was strained.               |  |  |  |  |  |
| I have learned some nice things about other people in my life.            |  |  |  |  |  |
| Communication between my loved one and me has improved.                   |  |  |  |  |  |
| I felt that my loved one made requests over and above what he/she needed. |  |  |  |  |  |

**91. Relationship Assessment Scale - 1 item (Hendrick, 1988)**

|                                                                               | <b>Not satisfied<br/>1</b> | <b>2</b> | <b>3</b> | <b>4</b> | <b>Very satisfied<br/>5</b> |
|-------------------------------------------------------------------------------|----------------------------|----------|----------|----------|-----------------------------|
| In general, how satisfied are you with your relationship with your loved one? |                            |          |          |          |                             |

## Module 1

**92. Do you feel you had a choice in taking on this responsibility of caring for your loved one?**

- ☐ No  
☐ Yes

**93. Revised Familism Scale (RFS) (Losada et al., 2020)**

The following questions examine family relationships. Please rate on the scale how much you agree or disagree with each statement:

|                                                                                                   | <b>Strongly disagree</b> | <b>Disagree</b> | <b>Neither agree nor disagree</b> | <b>Agree</b> | <b>Strongly agree</b> |
|---------------------------------------------------------------------------------------------------|--------------------------|-----------------|-----------------------------------|--------------|-----------------------|
| 1 - One should make great sacrifices in order to guarantee a good education for his/her children. |                          |                 |                                   |              |                       |
| 2 - I would help within my means if a relative told me that they are in financial difficulty.     |                          |                 |                                   |              |                       |
| 3 - One should have the hope of living long enough to see his/her grandchildren grow up.          |                          |                 |                                   |              |                       |
| 4 - A person should share his/her home with uncles, aunts or first cousins if they are in need.   |                          |                 |                                   |              |                       |
| 5 - When someone has problems s/he can count on the help of relatives. (Generally)                |                          |                 |                                   |              |                       |
| 6 - When one has problems, one can count on the help of relatives. (Oneself/In relation to self)  |                          |                 |                                   |              |                       |
| 7 - One can count on help from his/her relatives to solve most problems.                          |                          |                 |                                   |              |                       |
| 8 - Much of what a son or daughter does should be done to please the parents.                     |                          |                 |                                   |              |                       |
| 9 - The family should consult close relatives (uncles, aunts) concerning its important decisions. |                          |                 |                                   |              |                       |

|                                                                                                                                                                 |  |  |  |  |  |
|-----------------------------------------------------------------------------------------------------------------------------------------------------------------|--|--|--|--|--|
| 10 - One should be embarrassed about the bad things done by his/her brothers or sisters.                                                                        |  |  |  |  |  |
| 11 - Children should live in their parents' house until they get married.                                                                                       |  |  |  |  |  |
| 12 - A person should help his or her elderly parents in times of need, for example, help financially or share a house.                                          |  |  |  |  |  |
| 13 - A person should live near his or her parents and spend time with them on a regular basis.                                                                  |  |  |  |  |  |
| 14 - A person should always support members of the extender family, for example, aunts, uncles, and in-laws, if they are in need even if it is a big sacrifice. |  |  |  |  |  |
| 15 - A person should respect his or her older brothers and sisters regardless of their differences in views.                                                    |  |  |  |  |  |
| 16 - A person should be a good person for the sake of his or her family.                                                                                        |  |  |  |  |  |
| 17 - Children should obey their parents without question even if they believe they are wrong.                                                                   |  |  |  |  |  |
| 18 - Parents and grandparents should be treated with great respect regardless of their differences in views                                                     |  |  |  |  |  |
| 19 - A person should often do activities with his or her immediate and extended families, for example, eat meals, play games, go                                |  |  |  |  |  |



|                                                                                                                                                                                                                                                                                              |  |  |  |  |  |  |  |  |  |  |
|----------------------------------------------------------------------------------------------------------------------------------------------------------------------------------------------------------------------------------------------------------------------------------------------|--|--|--|--|--|--|--|--|--|--|
| <b>How well do you feel you understand your loved one's illness?</b><br>1      2      3      4      5      6      7      8      9      10<br>don't understand      understand<br>at all very clearly                                                                                         |  |  |  |  |  |  |  |  |  |  |
| <b>How much does your loved one's illness affect you emotionally? (e.g. does it make you angry, scared, upset or depressed?)</b><br>1      2      3      4      5      6      7      8      9      10<br>not at all      extremely<br>affected      affected<br>emotionally      emotionally |  |  |  |  |  |  |  |  |  |  |
| <b>Please list in rank-order the three most important factors that you believe caused <u>your loved one's illness</u>. <i>The most important causes for me:</i></b><br><br>1. ____<br>2. ____<br>3. ____                                                                                     |  |  |  |  |  |  |  |  |  |  |

### 95. Meaning in Life Questionnaire (MLQ) (Steger et al., 2006)

Please take a moment to think about what makes your life and existence feel important and significant to you. Please respond to the following statements as truthfully and accurately as you can, and also please remember that these are very subjective questions and that there are no right or wrong answers. Please answer according to the scale below:

|                                                                                                   | Absolutely untrue | Mostly Untrue | Somewhat Untrue | Can't Say True or False | Somewhat True | Mostly True | Absolutely True |
|---------------------------------------------------------------------------------------------------|-------------------|---------------|-----------------|-------------------------|---------------|-------------|-----------------|
| I understand my life's meaning.<br>I am looking for something that makes my life feel meaningful. |                   |               |                 |                         |               |             |                 |
| I am always looking to find my life's purpose.                                                    |                   |               |                 |                         |               |             |                 |

|                                                                          |  |  |  |  |  |  |  |
|--------------------------------------------------------------------------|--|--|--|--|--|--|--|
| My life has a clear sense of purpose.                                    |  |  |  |  |  |  |  |
| I have a good sense of what makes my life meaningful.                    |  |  |  |  |  |  |  |
| I have discovered a satisfying life purpose.                             |  |  |  |  |  |  |  |
| I am always searching for something that makes my life feel significant. |  |  |  |  |  |  |  |
| I am seeking a purpose or mission for my life.                           |  |  |  |  |  |  |  |
| My life has no clear purpose.                                            |  |  |  |  |  |  |  |
| I am searching for meaning in my life.                                   |  |  |  |  |  |  |  |

**96. Portrait Values Questionnaire (PVQ-21) (Schwartz et al., 2001)**

Here we briefly describe some people. Please read each description and think about how much each person is or is not like you.

How much is this person like you?

|                                                                                                                                                             | <b>very<br/>much<br/>like me</b> | <b>like me</b> | <b>somew<br/>hat like<br/>me</b> | <b>a little<br/>like me</b> | <b>not like<br/>me</b> | <b>not<br/>like<br/>me at<br/>all</b> |
|-------------------------------------------------------------------------------------------------------------------------------------------------------------|----------------------------------|----------------|----------------------------------|-----------------------------|------------------------|---------------------------------------|
| It is important to him/her to be rich. He/she wants to have a lot of money and expensive things.                                                            |                                  |                |                                  |                             |                        |                                       |
| He/she thinks it is important that every person in the world should be treated equally. He/she believes everyone should have equal opportunities in life.   |                                  |                |                                  |                             |                        |                                       |
| It's very important to him/her to show his/her abilities. He/she wants people to admire what he/she does.                                                   |                                  |                |                                  |                             |                        |                                       |
| It is important to him/her to listen to people who are different from him/her. Even when he/she disagrees with them, he/she still wants to understand them. |                                  |                |                                  |                             |                        |                                       |
| It's very important to him/her to help the people around him/her. He/she wants to care for their well-being.                                                |                                  |                |                                  |                             |                        |                                       |
| Being very successful is important to him/her. He/she hopes people will recognize his/her achievements.                                                     |                                  |                |                                  |                             |                        |                                       |
| It is important to him/her to get respect from others. He/She wants people to do what he/she says.                                                          |                                  |                |                                  |                             |                        |                                       |
| It is important to him/her to be loyal to his/her friends. He/she wants to devote himself/herself to people close to him/her.                               |                                  |                |                                  |                             |                        |                                       |
| He/she strongly believes that people should care for nature. Looking after the environment is important to him/her.                                         |                                  |                |                                  |                             |                        |                                       |

## Module 2

Here are some questions about your loved one's living arrangements and the geographic distance between you and them. Please read each of the questions carefully and choose the answer that best applies to your loved one's situation.

*Skip to question 105 if you answered “yes” to question 39*

**97. Over the past month, how often did you visit your loved one?**

- ☐ Daily
- ☐ More than once a week
- ☐ Once a week
- ☐ Less than once a week

**98. Over the past 3 months, how often did you feel unable to continue caring for your loved one because you don't live together?**

- ☐ Never
- ☐ Rarely
- ☐ Sometimes
- ☐ Often
- ☐ Always

**99. Travel time to visit your loved one is:**

- ☐ Greater than the time actually spent visiting
- ☐ Equal to the time spent visiting
- ☐ Shorter than the time spent visiting

**100. To what extent is the geographic distance between you and your loved one, a barrier to your investment in their care?**

- ☐ Not at all
- ☐ A little
- ☐ Somewhat
- ☐ A lot

**101. Do you feel that the travel time to your loved one, negatively impacts your personal daily activities ?**

*For example, housework, shopping, social outings, religious activities, etc.*

- ☐ Not at all
- ☐ A little
- ☐ Somewhat
- ☐ A lot

**102. Since the onset of care dependency, have you ever considered moving to shorten the geographic distance between you and your loved one?**



- ☐ No
- ☐ Yes

**103. Do you feel that the geographic distance between you and your loved one, negatively impacts your relationship with them?**

- ☐ Not at all
- ☐ A little
- ☐ Somewhat
- ☐ A lot

**104. Over the past 3 months, how often did you feel like leaving the care of your loved one to someone else, due to the travel time it takes to visit them?**

- ☐ Never
- ☐ Rarely
- ☐ Sometimes
- ☐ Often
- ☐ Always

**We would now like to ask you some questions relating to the mode of transportation you are using and the help that your loved one might receive from you, regarding their transportation needs.**

**105. What is your primary mode of transportation during a typical week?**

*Public transport includes: bus, coach, tram and metro*

- ☐ Walking
- ☐ Bicycle
- ☐ Car
- ☐ Motorcycle
- ☐ Train
- ☐ Public transport

**106. Is your loved one currently able to get to the services they are using or activities by themselves?**

*For example, drive or use public transportation to medical services, shopping or errands, social activities, family or personal business, religious activities, etc.*

- ☐ No, they need assistance.
- ☐ Yes (Skip to question 108)

**107. Please indicate the reason(s) why your loved one needs assistance to get to these services or activities:**

*Please select all that apply.*

- ☐ Diagnosed Health condition/s as indicated earlier
- ☐ Hearing impairment
- ☐ Vision impairment
- ☐ Reduced mobility
- ☐ Prescription drug side effects
- ☐ They do not have a driver's license
- ☐ Old age
- ☐ If Other, please specify

**108. Skip to question 108 if you answered "no" to question 106**

**What is your loved one's primary mode of transportation during a typical week?**

*Public transport includes: bus, coach, tram and metro*

- ☐ Walking
- ☐ Bicycle
- ☐ Car
- ☐ Motorcycle
- ☐ Train
- ☐ Public transport

**109. Over the past 3 months, how much did you assist your loved one to get to the following services they are using or activities?**

*For example, assisting by driving them to these services/activities or helping them with using public transportation.*

Not Applicable option is provided in case some of these services/activities are irrelevant to your loved one's circumstances or you don't personally assist them to get to these services/activities

|                     | For all of their trips | For about 75% of their trips |
|---------------------|------------------------|------------------------------|------------------------------|------------------------------|------------------------------|------------------------------|
| Medical services    |                        |                              |                              |                              |                              |                              |
| Shopping or errands |                        |                              |                              |                              |                              |                              |

|                                    |  |  |  |  |  |  |
|------------------------------------|--|--|--|--|--|--|
| Social and recreational activities |  |  |  |  |  |  |
| Family or personal business        |  |  |  |  |  |  |
| Religious activities               |  |  |  |  |  |  |

**110. How long does it take you to get your loved one to the following services/activities?**

Not Applicable option is provided in case some of these services/activities are irrelevant to your loved one's circumstances or you don't personally assist them to get to these services/activities

|                                    | Less than 15 minutes |
|------------------------------------|----------------------|----------------------|----------------------|----------------------|----------------------|----------------------|
| Medical services                   |                      |                      |                      |                      |                      |                      |
| Shopping or errands                |                      |                      |                      |                      |                      |                      |
| Social and recreational activities |                      |                      |                      |                      |                      |                      |
| Family or personal business        |                      |                      |                      |                      |                      |                      |
| Religious activities               |                      |                      |                      |                      |                      |                      |

*Skip to question 113 if you answered "Yes" to question 39*

**111. Is there available parking near your loved one's residence?**

- ☐ No  
☐ Yes

**112. To what extent, is the availability of parking near your loved one's residence, a barrier to your investment in their care?**

- ☐ Not at all  
☐ A little

- ☐ Somewhat
- ☐ A lot

**113. Over the past 3 months, how often did you feel like leaving the care of your loved one to someone else, due to their transportation needs?**

- ☐ Never
- ☐ Rarely
- ☐ Sometimes
- ☐ Often
- ☐ Always

**114. Do you feel that the transportation needs of your loved one, negatively impact your personal daily activities?**

*For example, housework, shopping, social outings, religious activities etc.*

- ☐ Not at all
- ☐ A little
- ☐ Somewhat
- ☐ A lot

**We would now like to ask you some questions relating to the support services you, the caregiver, received in the past 6 months.**

Answer questions 115 and 116 if you selected that you have received coordination services on question 74

**115. You indicated that you have received coordination services providing information about the help, support and benefits that is available and how to access it. How far is your home from these services?**

- ☐ Less than 15 minutes
- ☐ 15 to 30 minutes
- ☐ 30 to 60 minutes
- ☐ 60 to 90 minutes
- ☐ 90 to 120 minutes
- ☐ More than 120 minutes

**116. Over the past 6 months, how often did you feel discouraged from using these coordination services due to the travel time it needs to get there?**

- ☐ Never
- ☐ Rarely
- ☐ Sometimes
- ☐ Often
- ☐ Always

Answer questions 117 and 118 if you selected that you have received information services on question 73

**117. You indicated that you have received services providing information about the disease that your loved one has. How far is your home from these services?**

- ☐ Less than 15 minutes
- ☐ 15 to 30 minutes
- ☐ 30 to 60 minutes
- ☐ 60 to 90 minutes
- ☐ 90 to 120 minutes
- ☐ More than 120 minutes

**118. Over the past 6 months, how often did you feel discouraged from using these services that provide information about the disease that your loved one has, due to the travel time it needs to get there?**

- ☐ Never
- ☐ Rarely
- ☐ Sometimes
- ☐ Often
- ☐ Always

Answer questions 119 and 120 if you selected that you have received counselling services on question 74

**119. You indicated that you have received counselling services. How far is your home from these services?**

- ☐ Less than 15 minutes
- ☐ 15 to 30 minutes
- ☐ 30 to 60 minutes
- ☐ 60 to 90 minutes
- ☐ 90 to 120 minutes
- ☐ More than 120 minutes

**120. Over the past 6 months, how often did you feel discouraged from using these counselling services due to the travel time it needs to get there?**

- ☐ Never
- ☐ Rarely
- ☐ Sometimes
- ☐ Often
- ☐ Always

Answer questions 121 and 122 if you selected that you have received self-help or support group services on question 74

**121. You indicated that you have received self-help or support group services. How far is your home from these services?**

- ☐ Less than 15 minutes
- ☐ 15 to 30 minutes

- ☐ 30 to 60 minutes
- ☐ 60 to 90 minutes
- ☐ 90 to 120 minutes
- ☐ More than 120 minutes

**122. Over the past 6 months, how often did you feel discouraged from using these self-help or support services due to the travel time it needs to get there?**

- ☐ Never
- ☐ Rarely
- ☐ Sometimes
- ☐ Often
- ☐ Always

Answer questions 123 and 124 if you selected that you have received training services on question 74

**123. You indicated that you have received training to help you develop the skills you need to provide care and cope with the burden of care. How far is your home from these services?**

- ☐ Less than 15 minutes
- ☐ 15 to 30 minutes
- ☐ 30 to 60 minutes
- ☐ 60 to 90 minutes
- ☐ 90 to 120 minutes
- ☐ More than 120 minutes

**124. Over the past 6 months, how often did you feel discouraged from using these training services due to the travel time it needs to get there?**

- ☐ Never
- ☐ Rarely
- ☐ Sometimes
- ☐ Often
- ☐ Always

**125. In your opinion, which service(s) would most help you as a caregiver?**

*Please select all that apply.*

- ☐ Services providing information about the disease that your loved one has
- ☐ Coordination services providing information and advice about the type of help, support and benefits that is available to carers and how to access
- ☐ Training services to help carers develop the skills they need to care and cope with the burden of care
- ☐ Counselling services (i.e. supportive and social counselling, etc.)
- ☐ Self-help or support group services
- ☐ If Other, please specify

**126. How far would you be willing to travel for this service(s)?**

- ☐ Less than 15 minutes
- ☐ 15 to 30 minutes
- ☐ 30 to 60 minutes
- ☐ 60 to 90 minutes
- ☐ 90 to 120 minutes
- ☐ More than 120 minutes
- ☐ I would prefer to receive these services online

**127. Over the past 3 months, how often did you feel that you lack information about your loved one's condition?**

*For example, information about the course of their condition, their medical care, their medical exams results, etc.*

- ☐ Never
- ☐ Rarely
- ☐ Sometimes
- ☐ Often
- ☐ Always

**128. The Relationship Structures Questionnaire of the Experiences in Close Relationships - Revised (ECR-RS)**

(Fraley et al., 2011)

**Please read each of the following statements carefully and rate the extent to which you believe each statement best describes your feelings about your loved one.**

It helps to turn to my loved one in times of need.

**strongly disagree 1 2 3 4 5 6 7 strongly agree**

I usually discuss my problems and concerns with my loved one.

**strongly disagree 1 2 3 4 5 6 7 strongly agree**

I talk things over with my loved one.

**strongly disagree 1 2 3 4 5 6 7 strongly agree**

I find it easy to depend on my loved one.

**strongly disagree 1 2 3 4 5 6 7 strongly agree**

I don't feel comfortable opening up to my loved one.

**strongly disagree 1 2 3 4 5 6 7 strongly agree**

I prefer not to show my loved one how I feel deep down.

**strongly disagree 1 2 3 4 5 6 7 strongly agree**

I often worry that my loved one doesn't really care for me.

**strongly disagree 1 2 3 4 5 6 7 strongly agree**

I'm afraid that my loved one may abandon me.

**strongly disagree 1 2 3 4 5 6 7 strongly agree**

I worry that my loved one won't care about me as much as I care about them.

**strongly disagree 1 2 3 4 5 6 7 strongly agree**

---

**129. Big-Five Inventory Extra Short Form (BFI-2-XS) (Soto & John, 2017)**

**Here are a number of characteristics that may or may not apply to you. For example, do you agree that you are someone who likes to spend time with others? Please read each of the statements carefully and rate the extent to which you agree or disagree.**

**I am someone who...**

|                                             | <b>Disagree<br/>strongly</b> | <b>Disagree a<br/>little</b> | <b>Neutral; no<br/>opinion</b> | <b>Agree a little</b> | <b>Agree<br/>strongly</b> |
|---------------------------------------------|------------------------------|------------------------------|--------------------------------|-----------------------|---------------------------|
| Tends to be quiet.                          |                              |                              |                                |                       |                           |
| Is compassionate, has a soft heart.         |                              |                              |                                |                       |                           |
| Tends to be disorganized.                   |                              |                              |                                |                       |                           |
| Worries a lot.                              |                              |                              |                                |                       |                           |
| Is fascinated by art, music, or literature. |                              |                              |                                |                       |                           |
| Is dominant, acts as a leader.              |                              |                              |                                |                       |                           |
| Is sometimes rude to others.                |                              |                              |                                |                       |                           |
| Has difficulty getting started on tasks.    |                              |                              |                                |                       |                           |
| Tends to feel depressed, blue.              |                              |                              |                                |                       |                           |



|                                          |  |  |  |  |  |
|------------------------------------------|--|--|--|--|--|
| Has little interest in abstract ideas.   |  |  |  |  |  |
| Is full of energy.                       |  |  |  |  |  |
| Assumes the best about people.           |  |  |  |  |  |
| Is reliable, can always be counted on.   |  |  |  |  |  |
| Is emotionally stable, not easily upset. |  |  |  |  |  |
| Is original, comes up with new ideas.    |  |  |  |  |  |

**130. The Pearlin Mastery Scale (Pearlin & Schooler, 1978)**

**On a scale of 1 to 4 with 1 meaning "Strongly Disagree" and 4 meaning "Strongly Agree", how strongly do you agree or disagree with these statements about yourself?**

|                                                                 | Strong Disagree | Disagree | Agree | Strongly Agree |
|-----------------------------------------------------------------|-----------------|----------|-------|----------------|
| There is really no way I can solve some of the problems I have. |                 |          |       |                |
| Sometimes I feel that I'm being pushed around in life.          |                 |          |       |                |
| I have little control over the things that happen to me.        |                 |          |       |                |
| I can do just about anything I really set my mind to.           |                 |          |       |                |
| I often feel helpless in dealing with the problems of life.     |                 |          |       |                |
| What happens to me in the future mostly depends on me.          |                 |          |       |                |

|                                                                             |  |  |  |  |
|-----------------------------------------------------------------------------|--|--|--|--|
| There is little I can do to change many of the important things in my life. |  |  |  |  |
|-----------------------------------------------------------------------------|--|--|--|--|

---

**131. Toronto Empathy Questionnaire (TEQ) (Spreng et al., 2009)**

**Below is a list of statements. Please read each of the statements carefully and rate how frequently you feel or act in the manner described. There are no right or wrong answers or trick questions. Please answer each question as honestly as you can.**

|                                                                      | <b>Never</b> | <b>Rarely</b> | <b>Sometimes</b> | <b>Often</b> | <b>Always</b> |
|----------------------------------------------------------------------|--------------|---------------|------------------|--------------|---------------|
| When someone else is feeling excited, I tend to get excited too.     |              |               |                  |              |               |
| Other people's misfortunes do not disturb me a great deal.           |              |               |                  |              |               |
| It upsets me to see someone being treated disrespectfully.           |              |               |                  |              |               |
| I remain unaffected when someone close to me is happy.               |              |               |                  |              |               |
| I enjoy making other people feel better.                             |              |               |                  |              |               |
| I have tender, concerned feelings for people less fortunate than me. |              |               |                  |              |               |
| When a friend starts to talk about his\her problems, I try           |              |               |                  |              |               |

|                                                                                   |  |  |  |  |  |
|-----------------------------------------------------------------------------------|--|--|--|--|--|
| to steer the conversation towards something else.                                 |  |  |  |  |  |
| I can tell when others are sad even when they do not say anything.                |  |  |  |  |  |
| I find that I am “in tune” with other people’s moods.                             |  |  |  |  |  |
| I do not feel sympathy for people who cause their own serious illnesses.          |  |  |  |  |  |
| I become irritated when someone cries.                                            |  |  |  |  |  |
| I am not really interested in how other people feel.                              |  |  |  |  |  |
| I get a strong urge to help when I see someone who is upset.                      |  |  |  |  |  |
| When I see someone being treated unfairly, I do not feel very much pity for them. |  |  |  |  |  |
| I find it silly for people to cry out of happiness.                               |  |  |  |  |  |
| When I see someone being                                                          |  |  |  |  |  |

|                                                                               |  |  |  |  |  |
|-------------------------------------------------------------------------------|--|--|--|--|--|
| taken<br>advantage of, I<br>feel kind of<br>protective<br>towards<br>him/her. |  |  |  |  |  |
|-------------------------------------------------------------------------------|--|--|--|--|--|

---

## Module 3

### 132. Perception of Collaboration Questionnaire (PCQ) (Berg et al., 2008)

Here are some questions about perceptions of collaboration between you and your loved one. Please indicate the extent to which you agree or disagree with that statement

|                                                                                                                                                                          | Strongly<br>disagree | Disagree | Neutral | Agree | Strongly agree |
|--------------------------------------------------------------------------------------------------------------------------------------------------------------------------|----------------------|----------|---------|-------|----------------|
| It is necessary<br>for my loved<br>one and I to<br>work together,<br>as it is harder<br>for my loved<br>one to solve<br>problems and<br>make decisions<br>by him/herself |                      |          |         |       |                |
| My loved one<br>makes better<br>decisions when<br>we work<br>together                                                                                                    |                      |          |         |       |                |
| My loved one<br>and I always<br>work together<br>to deal with<br>care-related<br>decisions                                                                               |                      |          |         |       |                |
| Nearly every<br>day my loved<br>one and I work<br>together to<br>make care-<br>related<br>decisions                                                                      |                      |          |         |       |                |

|                                                                                                        |  |  |  |  |  |
|--------------------------------------------------------------------------------------------------------|--|--|--|--|--|
| It is rare for my loved one and I to share care-related tasks and make decisions together              |  |  |  |  |  |
| My loved one enjoys the support and encouragement he/she receives when we work together                |  |  |  |  |  |
| Working together with my loved one is useful as I make up for things that my loved one doesn't do well |  |  |  |  |  |
| Solving everyday problems and making decisions together with my loved one brings us closer together    |  |  |  |  |  |
| My loved one dislikes my assistance as it makes him/her feel incompetent                               |  |  |  |  |  |

**133. Dyadic Coping Inventory (DCI) - stress communication subscale** (Bodenmann, 2000)

Please respond to any item by marking the appropriate case, which is fitting to your personal situation.

This section is about how you communicate your stress with your loved one:

|  |             |        |           |       |            |
|--|-------------|--------|-----------|-------|------------|
|  | Very rarely | Rarely | Sometimes | Often | Very often |
|--|-------------|--------|-----------|-------|------------|

|                                                                                           |  |  |  |  |  |
|-------------------------------------------------------------------------------------------|--|--|--|--|--|
| I let my loved one know that I appreciate his/her practical support, advice, or help      |  |  |  |  |  |
| I ask my loved one to do things for me when I have too much to do                         |  |  |  |  |  |
| I show my loved one through my behaviour when I am not doing well or when I have problems |  |  |  |  |  |
| I tell my loved one openly how I feel and that I would appreciate his/her support         |  |  |  |  |  |

This section is about how your loved one communicates when he/she is feeling stressed:

|                                                                                         | Very rarely | Rarely | Sometimes | Often | Very often |
|-----------------------------------------------------------------------------------------|-------------|--------|-----------|-------|------------|
| My loved one lets me know that he/she appreciates my practical support, advice, or help |             |        |           |       |            |
| My loved one asks me to do things for him/her when he/she has too much to do            |             |        |           |       |            |
| My loved one shows me through                                                           |             |        |           |       |            |

|                                                                                                             |  |  |  |  |  |
|-------------------------------------------------------------------------------------------------------------|--|--|--|--|--|
| his/her<br>behaviour that<br>he/she is not<br>doing well or<br>when he/she<br>has problems                  |  |  |  |  |  |
| My loved one<br>tells me openly<br>how he/she<br>feels and that<br>he/she would<br>appreciate my<br>support |  |  |  |  |  |

**134. Mutuality scale (MS)** (Archbold et al., 1990)

Now we would like you to let us know how you and your loved one feel about each other at the current time.

|                                                                                             | Not at all | A little | Some | Quite a bit | A great deal |
|---------------------------------------------------------------------------------------------|------------|----------|------|-------------|--------------|
| To what<br>extent do the<br>two of you see<br>eye to eye<br>(agree on<br>things)?           |            |          |      |             |              |
| How close do<br>you feel to<br>your loved<br>one?                                           |            |          |      |             |              |
| How much do<br>you enjoy<br>sharing past<br>experiences<br>with your<br>loved one?          |            |          |      |             |              |
| How much<br>does your<br>loved one<br>express<br>feelings of<br>appreciation<br>for you and |            |          |      |             |              |

|                                                                    |  |  |  |  |  |
|--------------------------------------------------------------------|--|--|--|--|--|
| the things you do?                                                 |  |  |  |  |  |
| How attached are you to your loved one?                            |  |  |  |  |  |
| How much does your loved one help you?                             |  |  |  |  |  |
| How much do you like to sit and talk with your loved one?          |  |  |  |  |  |
| How much love do you feel for your loved one?                      |  |  |  |  |  |
| To what extent do the two of you share the same values?            |  |  |  |  |  |
| When you really need it, how much does your loved one comfort you? |  |  |  |  |  |
| How much do the two of you laugh together?                         |  |  |  |  |  |
| How much do you confide in your loved one?                         |  |  |  |  |  |
| How much emotional support does your loved one give you?           |  |  |  |  |  |



|                                                                      |  |  |  |  |  |
|----------------------------------------------------------------------|--|--|--|--|--|
| To what extent do you enjoy the time the two of you spend together?  |  |  |  |  |  |
| How often does your loved one express feelings of warmth toward you? |  |  |  |  |  |

**135. The perceived partner responsiveness scale (PPRS) (Reis et al., 2018)**

Please answer the following questions about your loved one.

My loved one usually:

[illegible]

|                                                                |  |  |  |  |  |  |  |  |  |
|----------------------------------------------------------------|--|--|--|--|--|--|--|--|--|
| that is the<br>"real" me                                       |  |  |  |  |  |  |  |  |  |
| expresses liking<br>and<br>encouragement<br>for me             |  |  |  |  |  |  |  |  |  |
| seems<br>interested in<br>what I am<br>thinking and<br>feeling |  |  |  |  |  |  |  |  |  |
| values my<br>abilities and<br>opinions                         |  |  |  |  |  |  |  |  |  |

**136. Social Support List (SSL) (Kempen & Van Eijk, 1995; Van Sonderen, 1993)**

The next questions concern the help and support you provide to your loved one. Please keep your loved one in mind.

How often do you:

|                                                           | Seldom or never | Now and then | Quite often | Very often |
|-----------------------------------------------------------|-----------------|--------------|-------------|------------|
| Provide attention<br>to your loved one                    |                 |              |             |            |
| Provide support to<br>your loved one                      |                 |              |             |            |
| Show that you<br>appreciate your<br>loved one             |                 |              |             |            |
| Provide<br>instrumental<br>support to your<br>loved one   |                 |              |             |            |
| Keep your loved<br>one company                            |                 |              |             |            |
| Provide<br>information and<br>advice to your<br>loved one |                 |              |             |            |

|                                                   |  |  |  |  |
|---------------------------------------------------|--|--|--|--|
| React in a distant manner to your loved one       |  |  |  |  |
| Do not keep your appointments with your loved one |  |  |  |  |
| Make disapproving remarks to your loved one       |  |  |  |  |
| Blame or holding things against your loved one    |  |  |  |  |
| Treat your loved one unfairly                     |  |  |  |  |
| Make unreasonable demands to your loved one       |  |  |  |  |
| Interfere too much with your loved one            |  |  |  |  |

The next questions concern the help and support you receive from your loved one. Please keep your loved one in mind.

How often does your loved one:

|                                       | Seldom or never | Now and then | Quite often | Very often |
|---------------------------------------|-----------------|--------------|-------------|------------|
| Provide attention to you              |                 |              |             |            |
| Provide support to you                |                 |              |             |            |
| Show that he/she appreciates you      |                 |              |             |            |
| Provide instrumental support to you   |                 |              |             |            |
| Keep you company                      |                 |              |             |            |
| Provide information and advice to you |                 |              |             |            |

|                                            |  |  |  |  |
|--------------------------------------------|--|--|--|--|
| React in a distant manner to you           |  |  |  |  |
| Do not keep his/her appointments with you  |  |  |  |  |
| Make disapproving remarks to you           |  |  |  |  |
| Blame or holding things against you        |  |  |  |  |
| Treat you unfairly                         |  |  |  |  |
| Make unreasonable demands to you           |  |  |  |  |
| Interfere too much with you your loved one |  |  |  |  |

## Module 4

We will now ask you questions regarding your current work status.

**137. Did you reduce your working hours due to your loved one's disease/condition (e.g. to care for your loved one)?**

- ☐ No  
☐ Yes

**138. Did you stop working because of caregiving?**

- ☐ No (skip to question 140)  
☐ Yes. How many hours per week did you used to work? \_\_\_\_\_ hours

**139. How many hours per week did you work before reducing your working hours?**

\_\_\_\_\_ hours per week.

*Skip to question 143 if you answered "no" to question 14*

Please answer the following questions in relation to the last week OR on a typical week if last week was a holiday

**140. During the last week, how many hours did you miss from work due to your loved one's disease/condition?**

Include hours missed when you came in late or left work early because you e.g. accompanied your loved one to doctor appointments, visited hospitals or clinics, or helped them with dressing, grooming, eating, or take medications.

- ☐ I did not miss any hours of work during the last week due to my loved one condition.
- ☐ I missed \_\_\_\_ hours of work last week due to my loved one condition (skip to question 142).

**141. Was any of this time missed from work unpaid?**

- ☐ No, all the time I missed from work was paid.
- ☐ Yes, \_\_\_\_\_ hour(s) were unpaid.

**142. During the last week, how much did your loved one's disease/condition affect your productivity while you were working?**

*If you were able to work as usual, choose a low number. If you were not able to work as usual (e.g. accomplished less than usual, could not concentrate or perform certain tasks as carefully as usual), choose a high number.*

|                           |                          |                          |                          |                          |                          |                          |                          |                          |                          |                          |                                |
|---------------------------|--------------------------|--------------------------|--------------------------|--------------------------|--------------------------|--------------------------|--------------------------|--------------------------|--------------------------|--------------------------|--------------------------------|
| Could<br>work as<br>usual |                          |                          |                          |                          |                          |                          |                          |                          |                          |                          | Could<br>not<br>work at<br>all |
|                           | <b>0</b>                 | <b>1</b>                 | <b>2</b>                 | <b>3</b>                 | <b>4</b>                 | <b>5</b>                 | <b>6</b>                 | <b>7</b>                 | <b>8</b>                 | <b>9</b>                 | <b>10</b>                      |
|                           | <input type="checkbox"/>       |

**143. Do you receive financial compensation from your loved one or another family member for the care that you provide?**

- ☐ No
- ☐ Yes: \_\_\_\_\_ per month.

We would now like to ask you some questions relating to the use of home care services and the decision to hire paid care workers

Skip to question 151 if you answered “no” to question 62

**144. Please indicate the home care services that your loved one has received in the last month.**

Please select all that apply.

- ☐ Help with personal care (e.g. dressing/undressing, washing/showering/bathing, hair care, shaving and grooming, and going to the toilet)
- ☐ Nursing care (e.g. administering medications and injections, monitoring vital signs, dressing wounds, performing medical therapies, nutrition via tubes, prevention and management of bed sores and any medical-related types of tasks)
- ☐ Help with household activities and tasks (e.g. preparing food, cleaning, washing, ironing, sewing, shopping, and gardening)
- ☐ Practical support (e.g. eating and drinking, moving inside or outside the house (including assistance with walking or using a wheelchair), visiting family or friends, accompany to healthcare visits (e.g. doctor appointments), filling prescriptions at the pharmacy, help taking medications, and taking care of financial matters (e.g. paying the bills or managing healthcare insurance)
- ☐ Sitting services (provide company and support to the dependent when a caregiver is temporarily absent)
- ☐ Home delivered meals/ Meals-on-wheels (ready-made meals provided by a municipality or a private provider)
- ☐ Telecare (e.g alarm buttons, help lines, bed monitors, video communication systems, fall and movement detectors, smartphone apps or any other technologies that assist your loved one to continue living at home)
- ☐ Other (specify below)
- ☐ None (skip to question 146)

**145. In a typical week, how many hours of the following home care service(s) does your loved one receive from one or more paid care workers?**

Please note that the home care services have been separated into services provided by a national care worker, and those provided by a migrant care worker(s).

To avoid overlap in the number of hours provided, if you believe that a task fits into more than one category, please select the category that you believe best fits the task.

Only fill in the rows that correspond to the selections made in question 144

| Home care service | In a typical week, how many hours of this service has been provided by a <b>national care worker</b> ? | <i>[Only complete this column if the person you provide care for receives care from a migrant care worker]</i> In a typical |
|-------------------|--------------------------------------------------------------------------------------------------------|-----------------------------------------------------------------------------------------------------------------------------|
|                   |                                                                                                        |                                                                                                                             |

|                                                                                                                                                                                                                                                                                                |  |                                                                                          |
|------------------------------------------------------------------------------------------------------------------------------------------------------------------------------------------------------------------------------------------------------------------------------------------------|--|------------------------------------------------------------------------------------------|
|                                                                                                                                                                                                                                                                                                |  | week, how many hours of this service has been provided by a <b>migrant care worker</b> ? |
| 1. Help with <b>personal care</b> (e.g. assistance with dressing/undressing, washing, combing, shaving, going to the toilet, moving around in the house, eating, drinking and administering medication and any other non-medical types of tasks).                                              |  |                                                                                          |
| 2. <b>Nursing care.</b> That would include administering medications and injections, monitoring vital signs, dressing wounds, performing medical therapies, nutrition via tubes, prevention and management of bed sores and any medical-related types of tasks.                                |  |                                                                                          |
| 3. Help with <b>household activities and tasks</b> (e.g. assistance with preparing food and drinks, cleaning the house, washing, ironing and sewing clothing, shopping for groceries or odd jobs in the house or the garden and any other household chores your loved one needs support with). |  |                                                                                          |

|                                                                                                                                                                                                                                                                                                                                                            |  |  |
|------------------------------------------------------------------------------------------------------------------------------------------------------------------------------------------------------------------------------------------------------------------------------------------------------------------------------------------------------------|--|--|
| 4. <b>Practical support</b><br>(e.g. moving around outside the house, going on outings and visiting family or friends, contacts with healthcare (accompanying your loved one for example to the general practitioner, the hospital, therapy), arranging assistance, devices and/or home modifications and organising financial and administrative matters. |  |  |
| 5. Sitting services<br>(provide company and support to the dependent when a caregiver is temporarily absent)                                                                                                                                                                                                                                               |  |  |
| 6. Home delivered meals/ Meals-on-wheels (i.e. ready-made meals provided by a municipality or a private provider)                                                                                                                                                                                                                                          |  |  |
| Telecare (i.e alarm buttons, help lines, bed monitors, video communication systems, fall and movement detectors, smartphone apps or any other technologies that assist your loved one to continue living at home).                                                                                                                                         |  |  |

**146. Why did you decide to hire a private care worker?**

*Please select all that apply.*

- ☐ It gives me more time to myself/for other tasks
- ☐ They can provide expertise/support that I can't
- ☐ I am not able to provide care



- ☐ To guarantee constant care
- ☐ To keep my same life style
- ☐ To safeguard my own family
- ☐ I live too far away/ too much travel
- ☐ To provide the necessary amount of care
- ☐ There are a lack of other alternatives
- ☐ So I am able to keep on working
- ☐ It is cheaper than other alternatives
- ☐ I am not willing to provide care
- ☐ My loved one was willing to have a cohabiting care worker
- ☐ If Other, please specify

Skip to question 148 if you answered “yes” to question 64 or question 69

**147. Why was it decided not to hire a migrant worker?**

*Please select all that apply.*

- ☐ I would not trust a migrant worker to take care of my loved one
- ☐ Not able to afford this service
- ☐ I prefer that the care worker is a national citizen
- ☐ My loved one refused this solution
- ☐ Do not know
- ☐ If Other, please specify

*Skip to question 151 if you answered “no” or “do not know” to question 64 or question 69*

**148. Why was it decided to hire a migrant worker?**

*Please select all that apply.*

- ☐ Economically convenient
- ☐ It is useful for both myself and my loved one
- ☐ Migrant workers provide care tasks that local staff are not able to provide (for example late night shifts/weekends).
- ☐ It is common practice
- ☐ To avoid having my loved one live in a residential facility
- ☐ Do not know
- ☐ If Other, please specify

**149. Were you involved in the decision to hire a migrant worker?**

- ☐ No

☐ Yes

**150. How did your loved one access services by a migrant care worker?<sup>4</sup>**

*Please select all that apply*

- ☐ Through recommendations from family or friends
- ☐ Through a care or recruitment agency
- ☐ Through a church or religious organization
- ☐ Through a government programme
- ☐ Through a non-profit organization
- ☐ Through social media
- ☐ Other, please specify:

We would now like to ask you some questions relating to the support service that you, the caregiver, received in the past 6 months

*Only answer question 151 if you selected "Information about the disease that the loved one has" on question 74*

**151. You indicated that you have received services providing information about the disease that your loved one has.**

Do you pay for this service when you utilise it?

- ☐ No
- ☐ Yes. How much do you pay for this service when you utilise it? \_\_\_\_\_.

*Only answer question 152 if you selected "Coordination services providing information and advice about the type of help, support and benefits that is available to carers and how to access it (e.g. information centers, case (or care) managers, advice or guidance from a physician or social worker" on question 74*

**152. You indicated that you have received coordination services providing information about the help, support and benefits that is available and how to access it. Do you pay for this service when you utilise it?**

- ☐ No
- ☐ Yes. How much do you pay for this service when you utilise it? \_\_\_\_\_.

*Only answer question 153 if you selected "Training to help carers develop the skills they need to care and cope with the burden of care" on question 74*

---

<sup>4</sup> Question not asked to participants in Sweden as the question was added after ethics approval in Sweden

**153. You indicated that you have received training to help you develop the skills you need to care. Do you pay for this service when you utilise it?**

- ☐ No
- ☐ Yes. How much do you pay for this service when you utilise it? \_\_\_\_\_.

*Only answer question 155 if you selected "Counselling (i.e. supportive and social counselling, etc.)" on question 74*

**154. You indicated that you have received counselling services. Do you pay for this service when you utilise it?**

- ☐ No
- ☐ Yes. How much do you pay for this service when you utilise it? \_\_\_\_\_.

**155. In this section we would like to find out about any financial costs that you may have had as a result of caring for your loved one**

**Please only include expenses you pay for with your own money or with household money and do not count expenses that are covered or reimbursed by a health or social insurance**

- **travel to visit your loved one or to take them to appointments at hospital, hospice, GP surgery or elsewhere?**

e.g. taxis, buses, trains, planes, parking, fuel if you travel in your own car, accommodation (to be close to the hospital, hospice or elsewhere), or any other incurred travel expenses.

- ☐ No
- ☐ Yes. How much did you pay in the last month? \_\_\_\_\_

- **for childcare or care for any other dependents?**

e.g. paying someone to look after children or any other dependents while you were caring for your loved one.

- ☐ No
- ☐ Yes. How much did you pay in the last month? \_\_\_\_\_

- **medical care for your loved one?**

e.g. health or long-term care insurance premiums, medical consultations, physio, private ambulance, hospital admissions, prescription medicines, over the counter medications or supplements (e.g. paracetamol, vitamins, etc.), complementary or alternative medicines/therapies (i.e. chiropractic and massage therapy).

- ☐ No
- ☐ Yes. How much did you pay in the last month? \_\_\_\_\_

- **your loved one's food, meals, household goods, incidentals or clothing?**

- ☐ No
- ☐ Yes. How much did you pay in the last month? \_\_\_\_\_.

- **your loved one's housing payments, rent, utilities or home maintenance and repairs?**

e.g. electricity, water, heating, phone, internet and yard care.

- ☐ No
- ☐ Yes. How much did you pay in the last month? \_\_\_\_\_

- **home care or in-home respite care services?**

\*In-home respite care is temporary or short-term care of an individual that is provided at their home by someone other than the person's normal caregiver.

- ☐ No
- ☐ Yes. How much did you pay in the last month? \_\_\_\_\_

- **out-of-home respite services for your loved one?**

e.g. day-care services and temporary stay at a residential or nursing home.

- ☐ No
- ☐ Yes. How much did you pay in the last month? \_\_\_\_\_

**156. In the last month, have you had out-of-pocket expenses for any of the following aids, appliances and modifications due to your loved one's condition?**

- **walking aids (e.g. stick/crutch, walker, cane, wheelchair, scooter)?**

- ☐ No
- ☐ Yes. How much did you pay in the last month? \_\_\_\_\_

- **home living aids (e.g. lifting/reclining armchair, stair lift, bath lift, shower seat, raisers for bed)?**

- ☐ No
- ☐ Yes. How much did you pay in the last month? \_\_\_\_\_

- **home or car modifications (e.g. ramps, rails, home extensions, wheel chair lift, boot hoist)?**

- ☐ No
- ☐ Yes. How much did you pay in the last month? \_\_\_\_\_

- **personal alarms or monitoring systems (e.g. webcams, intercom and tracking systems)?**

- ☐ No
- ☐ Yes. How much did you pay in the last month? \_\_\_\_\_

- **other aids or appliances?**

For example, incontinence aids (pads, pants, waterproof sheets/chair covers), respiratory aids (e.g. home oxygen, NIV machine), posture aids (e.g. back sup

- ☐ No
- ☐ Yes. How much did you pay in the last month? \_\_\_\_\_

- 157. In the last month, have you incurred any costs relating to health problems of your own that have occurred as a result of your caring role e.g.**

- ☐ No (skip to end of questionnaire)
- ☐ Yes. How much did you pay in the last month? \_\_\_\_\_

- 158. Please specify the type and amount of the cost(s) relating to health problem(s) of your own that have occurred as a result of your caring role**

| Nature of cost e.g. physio for back injury | Cost in in the last month |
|--------------------------------------------|---------------------------|
| 1                                          |                           |
| 2                                          |                           |
| 3                                          |                           |
| 4                                          |                           |
| 5                                          |                           |
| 6                                          |                           |
| 7                                          |                           |
| 8                                          |                           |

Thank you for completing our survey.

We very much appreciate the information that you have provided and your time taken in completing this survey. You can find the latest updates on our project at: <https://www.entwine-icohort.eu/>

If you have any further questions on the survey, please send us an email at: [entwinestudy@bangor.ac.uk](mailto:entwinestudy@bangor.ac.uk)
