# Supplementary material for: A Multinational Longitudinal Study Incorporating Intensive Methods to Examine Caregiver Experiences in the Context of Chronic Health Conditions: Protocol of the ENTWINE-iCohort
Source: MDPI journal article supplement (doi:10.3390/ijerph19020821), 2022-01-12
Supplement: s1 [file s1]

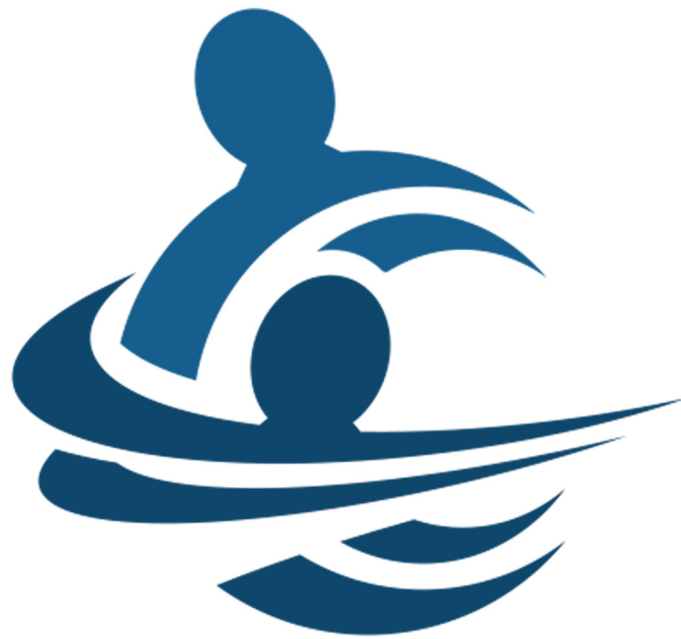

# ENTWINE

## INFORMAL CARE

*The European Training Network on Informal Care*

***ENTWINE-iCOHORT CARE RECIPIENT BASELINE SURVEY***

**1. Would you like to invite the person you provide care for to participate in this study?**

- ☐ Yes. Email address: \_\_\_\_\_
- ☐ Yes, but I would like to provide their email at a later date.
- ☐ Yes, but they do not have an email address.
- ☐ No

This study is being carried out by Bangor University (UK), University Medical Center of Groningen (The Netherlands), National Institute for Health and Science on Ageing (Italy), Bar-Ilan University (Israel) and Uppsala University (Sweden).

**Instructions for this questionnaire:**

- If you read ‘**your loved one**’, then the question refers to your caregiver.
- Read each question through completely before answering.
- “Other” option is provided in case you believe that the response options do not describe your situation adequately. In this case, please specify your answer by filling in the blank space next to it.
- If you need to take breaks while completing the survey, you can close the survey window at any point and your responses will be automatically saved. When you are ready to continue, simply click on the survey link you received by email and you will then be taken back to the last question you had answered before you exited during your previous session.
- We recommend that you fill in this questionnaire using a laptop or tablet.

**We thank you in advance for your valuable time taken to fill in this questionnaire!**

This questionnaire starts with some questions relating to you.

**2. How old are you?**

\_\_\_\_\_ years.

**3. What is your gender?**

- ☐ Female
- ☐ Male
- ☐ Non-binary / third gender
- ☐ Prefer to self describe:
- ☐ Prefer not to say

**4. Which city/town do you live in?**

\_\_\_\_\_

**5. Is your home located in?**

- ☐ central city/area
- ☐ peripheral area in the city
- ☐ rural area

**6. Please indicate the highest level of education you have achieved**

- ☐ Primary
- ☐ Secondary
- ☐ Post-secondary vocational education (e.g., further education college, apprenticeships etc.)
- ☐ Post secondary academic education (e.g., university)

☐ Not listed or other

**7. What is your marital status?**

- ☐ Single (never married) (skip to question 9)
- ☐ Married
- ☐ In a civil union/domestic partnership
- ☐ Divorced (skip to question 9)
- ☐ Widowed (skip to question 9)
- ☐ Other (specify) \_\_\_\_\_

**8. For how long have you been in this relationship?**

Years \_\_\_\_\_ Months \_\_\_\_\_

**9. Do you have children?**

*If you answer "yes", please specify how many children you have.*

- ☐ No (skip to question 12)
- ☐ Yes. I have \_\_\_\_\_ child(ren)

**10. Do you have children under 18 years of age?**

*If you answer "yes", please specify how many children under 18 years old you have.*

- ☐ No
- ☐ Yes. I have \_\_\_\_\_ children under 18 years of age.

**11. Do your children live in your home?**

*If you answer "yes", please specify how many children live in your home.*

- ☐ No
- ☐ Yes. \_\_\_\_\_ child(ren) live in my home

**12. Do you have siblings?**

*If yes, please provide the number of living siblings.*

- ☐ No
- ☐ Yes \_\_\_\_\_ sibling(s)

**13. Are your parents alive?**

*If yes, please detail how many of your parents are still alive.*

- ☐ No
- ☐ Yes \_\_\_\_\_ parent(s)

**14. Are you currently employed or self-employed (working for pay)?**

- ☐ No (skip to question 18)
- ☐ Yes

**15. Are you currently working full-time (e.g., according to your employment contract)?**

- ☐ No. I work part-time: \_\_\_\_\_ hours per week.
- ☐ Yes, I work full time: \_\_\_\_\_ hours per week.

**16. After any taxes and contributions, what is your average monthly income from employment?**

*Please include any additional or extra or lump sum payment, such as bonuses, 13 month, Christmas or Summer pays.*

- ☐ \_\_\_\_\_ (skip to question 20)
- ☐ I prefer not to answer this question.

**17. Please indicate your monthly income level after taxes and contributions.<sup>1</sup>**

*Please include any additional or extra or lump sum payment, such as bonuses, 13 month, Christmas or Summer pays.*

- ☐ Less than £800
- ☐ Between £800 and 1500
- ☐ Between £1500 and £4000
- ☐ More than £4000
- ☐ Prefer not to answer this question

**18. What is your religion, if any?<sup>2</sup>**

- ☐ Protestant
- ☐ Roman Catholic
- ☐ Eastern Orthodox
- ☐ Islam
- ☐ Jewish
- ☐ Buddhist
- ☐ Hindu
- ☐ Other (specify)
- ☐ I am not religious (skip to question 22)
- ☐ Prefer not to say

**19. What is the importance of religion in your life?**

- ☐ Not important at all
- ☐ Not too important
- ☐ Fairly important
- ☐ Very important

**20. What are your ethnic/family origins?<sup>3</sup>**

*Choose between sections A-E and select only one of the options that best describes your ethnic background.*

**A. European**

- ☐ British or Irish
- ☐ Scandinavian
- ☐ Eastern and Central European
- ☐ Mediterranean
- ☐ Any other European background, please write in:

**B. Asian**

- ☐ South Asian
- ☐ Chinese
- ☐ Japanese

---

<sup>1</sup> The income brackets provided in this question were applied in the UK. Income brackets for other countries were adjusted to reflect differences in average incomes of the population. These values were based on the Survey of Health, Ageing and Retirement in Europe (SHARE).

<sup>2</sup> Question not asked in Italy, Sweden and the Netherlands due to ethical reasons

<sup>3</sup> Question not asked in Italy, Sweden and the Netherlands due to ethical reasons

- ☐ Malaysian, Vietnamese or Filipino
- ☐ Any other Asian background, please write in:

C. Black

- ☐ Caribbean
- ☐ African
- ☐ Any other Black background, please write in:

D. Other ethnic group

- ☐ Jewish
- ☐ Arab
- ☐ Other ethnic group, please write in:
- ☐ Mixed/Multiple ethnic groups, please write in:
- ☐ E. Prefer not to say

**21. How would you describe your national identity?**

I am a national/citizen of:

---

**22. Did you migrate to the country you live in?**

- ☐ No (skip to question 27)
- ☐ Yes

**23. In what country were you born?**

---

**24. Did any of your parents migrate to the country you live in?**

- ☐ No (skip to question 27)
- ☐ Yes

**25. In what country was your father born?**

---

**26. In what country was your mother born?**

---

**27. What health condition(s) have you been diagnosed with?**

*Please select all that apply.*

- ☐ A heart attack including myocardial infarction or coronary thrombosis or any other heart problem including congestive heart failure
- ☐ High blood pressure or hypertension
- ☐ High blood cholesterol
- ☐ A stroke or cerebral vascular disease
- ☐ Diabetes or high blood sugar
- ☐ Chronic lung disease such as chronic bronchitis or emphysema
- ☐ Cancer (please specify the type of cancer if known).

- ☐ Stomach or duodenal ulcer, peptic ulcer
- ☐ Parkinson disease
- ☐ Cataracts
- ☐ Hip fracture
- ☐ Other fractures
- ☐ Alzheimer's disease, dementia, organic brain syndrome, senility or any other serious memory impairment, please specify:
- ☐ Multiple sclerosis
- ☐ Rheumatoid Arthritis
- ☐ Osteoarthritis, or other rheumatism
- ☐ Chronic kidney disease
- ☐ Traumatic brain injury
- ☐ HIV/AIDS
- ☐ Other condition(s) \_\_\_\_\_
- ☐ I have not been diagnosed with any conditions (skip to question 30)

**28. Which one of these health conditions do you think causes the most limitations to you?**

\_\_\_\_\_

**29. How long have you been living with this health condition?**

Years \_\_\_\_\_ Months \_\_\_\_\_

**30. Please tell me if you have any difficulty with these activities because of a physical, mental, emotional or memory problem. (Katz, 1983)**

*Please select all that apply.*

- ☐ Dressing, including putting on shoes and socks
- ☐ Walking across a room
- ☐ Bathing or showering
- ☐ Eating, such as cutting up their food
- ☐ Getting in or out of bed
- ☐ Using the toilet, including getting up or down
- ☐ None of these

**31. Who would you consider to be the person who provides most of the informal care for you?:**

- ☐ Spouse / Partner
- ☐ Child
- ☐ Parent
- ☐ Sibling
- ☐ Daughter- / Son-in-law
- ☐ Uncle / Aunt
- ☐ Nephew/ Niece
- ☐ Cousin
- ☐ Friend
- ☐ Neighbour
- ☐ Other, please specify \_\_\_\_\_

**Let's focus on this person who provides the most amount of care for you. From now on, we will refer to this person as "your loved one".**

**32. How long have you been receiving informal care from your loved one?**

- ☐ Less than a month: \_\_\_\_\_ week(s).
- ☐ Less than a year: \_\_\_\_\_ month(s).
- ☐ More than a year: \_\_\_\_\_ year(s).

Please fill in the following questions in relation to the **last week OR on a typical week** if last week was a holiday, or if you were away, or ill etc)

A limit of 126 hours has been set for the number of hours of care that you receive each week. The purpose of this limit is not to undervalue or underestimate the care that you receive. This limit has been set to allow your caregiver time (6 hours per day) for basic needs such as resting/sleeping and doing non-care related tasks.

**33. During the last week, on how many days were you provided with care from your loved one?**

- ☐ 0 days
- ☐ 1 day
- ☐ 2 days
- ☐ 3 days
- ☐ 4 days
- ☐ 5 days
- ☐ 6 days
- ☐ 7 days

**34. Besides the care or support you receive from your loved one, do you receive care from other informal caregivers?**

- ☐ No,
- ☐ Yes, from \_\_\_\_\_ [number] other informal caregivers

**35. Would you say that the help you receive from your caregiver(s) meets your needs?**

- ☐ All the time
- ☐ Usually
- ☐ Sometimes
- ☐ Hardly ever

**36. Do you share a household with your loved one?**

- ☐ No
- ☐ Yes (skip to question 40)

**37. Where do you live?**

- ☐ In my own home
- ☐ In someone else's home
- ☐ In an assisted living facility or other residential setting where some care is provided
- ☐ In a nursing care or long-term care facility

**38. How do you reach the place where your loved one lives?**

- ☐ They walk to my home
- ☐ They cycle to my home
- ☐ They drive to my home

- ☐ They use public transportation (bus, train)
- ☐ If Other, please specify \_\_\_\_\_

**39. How far (in minutes) is the place you live from the home of your loved one?**

- ☐ less than 15 minutes
- ☐ 15 to 30 minutes
- ☐ 30 to 60 minutes
- ☐ 60 to 90 minutes
- ☐ 90 to 120 minutes
- ☐ More than 120 minutes

Now we want to ask you about the services that you may have received from paid care worker(s) at home over the past three months.

These services are called home care services and include assistance with household activities and personal care, nursing care, setting services and overnight care.

**40. Besides the care or support you received from your family or friends, have you been provided with home care by one or more paid workers over the last month?**

- ☐ No (skip to question 54)
- ☐ Yes

**41. How many paid care workers are involved with your home care?**

- ☐ 1
- ☐ 2 (skip to question 47)
- ☐ 3 (skip to question 47)
- ☐ 4 (skip to question 47)
- ☐ More than 4 (skip to question 47)

**42. Was the paid worker a migrant care worker?**

"Migrant worker" refers to a person who is employed in a country that they migrated to. This includes not only people who migrated for the purpose of employment, but also those who migrated for other reasons (eg., family or education) and then gained employment at a later date.

- ☐ No (skip to question 45)
- ☐ Yes
- ☐ Do not know (skip to question 45)

**43. Please fill in the follow table based on the situation of the migrant care worker**

| Employed on a live-in basis? | Gender | Age   | Level of education | Marital status         |
|------------------------------|--------|-------|--------------------|------------------------|
| No                           | Female | 18-24 | Primary            | Single (never married) |
| Yes                          | Male   | 25-34 | Secondary          | Married                |



|  |                             |                |                                                                                                         |                                          |
|--|-----------------------------|----------------|---------------------------------------------------------------------------------------------------------|------------------------------------------|
|  | Non-binary<br>/third gender | 35-44          | Post-secondary<br>vocational education<br>(e.g., further<br>education college,<br>apprenticeships etc.) | In a civil union/domestic<br>partnership |
|  | Do not know                 | 45-54          | Post secondary<br>academic education<br>(e.g., university)                                              | Divorced                                 |
|  |                             | 55-64          | Not listed or other                                                                                     | Widowed                                  |
|  |                             | 65-74          | Do not know                                                                                             | Do not know                              |
|  |                             | 75+            |                                                                                                         |                                          |
|  |                             | Do not<br>know |                                                                                                         |                                          |

**44. What is the nationality of the migrant care worker?**

They are a national/citizen of:

\_\_\_\_\_

*Skip to question 53 if you answered “yes” to question 42*

**45. Please fill in the follow table based on the situation of the paid care worker**

| <b>Employe<br/>d on a<br/>live-in<br/>basis?</b> | <b>Gender</b>               | <b>Age</b> | <b>Level of education</b>                                                                               | <b>Marital status</b>                    |
|--------------------------------------------------|-----------------------------|------------|---------------------------------------------------------------------------------------------------------|------------------------------------------|
| No                                               | Female                      | 18-24      | Primary                                                                                                 | Single (never married)                   |
| Yes                                              | Male                        | 25-34      | Secondary                                                                                               | Married                                  |
|                                                  | Non-binary<br>/third gender | 35-44      | Post-secondary<br>vocational education<br>(e.g., further<br>education college,<br>apprenticeships etc.) | In a civil union/domestic<br>partnership |

|  |             |             |                                                      |             |
|--|-------------|-------------|------------------------------------------------------|-------------|
|  | Do not know | 45-54       | Post secondary academic education (e.g., university) | Divorced    |
|  |             | 55-64       | Not listed or other                                  | Widowed     |
|  |             | 65-74       | Do not know                                          | Do not know |
|  |             | 75+         |                                                      |             |
|  |             | Do not know |                                                      |             |

**46. Does the paid care worker have a migration background?**

*"Migration background" refers to a person who has:*

*(a) migrated into their present country of residence; and/or*

*(b) previously had a different nationality from their present country of residence; and /*

*or*

*(c) at least one of their parents previously entered their present country of residence as a migrant.*

☐ No

☐ Yes

☐ Do not know

*Skip to question 52 if you answered "no" or "do not know" to question 42*

**47. Were any of these paid workers a migrant worker?**

*"Migrant worker" refers to a person who is employed in a country that they migrated to.*

*This includes not only people who migrated for the purpose of employment, but also those who migrated for other reasons (eg., family or education) and then gained employment at a later date.*

☐ No (skip to question 50)

☐ Yes

☐ Do not know (skip to question 50)

**48. Please fill in a separate row in the table for each individual worker. "Migration background" refers to a person who has:**

*(a) migrated into their present country of residence; and/or*

*(b) previously had a different nationality from their present country of residence; and /*

*or*

*(c) at least one of their parents previously entered their present country of residence as a migrant.*

|  | Employed on a live-in basis? | Migrant | Migration background? | Gender | Age | Level of education | Marital status |
|--|------------------------------|---------|-----------------------|--------|-----|--------------------|----------------|
|--|------------------------------|---------|-----------------------|--------|-----|--------------------|----------------|

|                        |               | <b>worker<br/>?</b>                 |                                     |                                                                                    |                                                                                                         |                                                                                                                                                                                                                                                                                   |                                                                                                                                                |
|------------------------|---------------|-------------------------------------|-------------------------------------|------------------------------------------------------------------------------------|---------------------------------------------------------------------------------------------------------|-----------------------------------------------------------------------------------------------------------------------------------------------------------------------------------------------------------------------------------------------------------------------------------|------------------------------------------------------------------------------------------------------------------------------------------------|
| Care<br>worker n.<br>1 | No<br><br>Yes | No<br><br>Yes<br><br>Do not<br>know | No<br><br>Yes<br><br>Do not<br>know | Female<br><br>Male<br><br>Non-<br>binary<br>/third<br>gender<br><br>Do not<br>know | 18-24<br><br>25-34<br><br>35-44<br><br>45-54<br><br>55-64<br><br>65-74<br><br>75+<br><br>Do not<br>know | Primary<br><br>Secondary<br><br>Post-<br>secondary<br>vocational<br>education<br>(e.g., further<br>education<br>college,<br>apprenticeshi<br>ps etc.)<br><br>Post<br>secondary<br>academic<br>education<br>(e.g.,<br>university)<br><br>Not listed or<br>other<br><br>Do not know | Single (never<br>married)<br><br>Married<br><br>In a civil<br>union/domest<br>ic partnership<br><br>Divorced<br><br>Widowed<br><br>Do not know |
| Care<br>worker n.<br>2 | No<br><br>Yes | No<br><br>Yes<br><br>Do not<br>know | No<br><br>Yes<br><br>Do not<br>know | Female<br><br>Male<br><br>Non-<br>binary<br>/third<br>gender<br><br>Do not<br>know | 18-24<br><br>25-34<br><br>35-44<br><br>45-54<br><br>55-64<br><br>65-74<br><br>75+<br><br>Do not<br>know | Primary<br>Secondary<br>Post-<br>secondary<br>vocational<br>education<br>(e.g., further<br>education<br>college,<br>apprenticeshi<br>ps etc.)<br>Post<br>secondary<br>academic<br>education<br>(e.g.,<br>university)<br>Not listed or<br>other<br>Do not know                     | Single (never<br>married)<br><br>Married<br><br>In a civil<br>union/domest<br>ic partnership<br><br>Divorced<br><br>Widowed<br><br>Do not know |

|                  |           |                          |                          |                                                           |                                                                          |                                                                                                                                                                                                                   |                                                                                                                  |
|------------------|-----------|--------------------------|--------------------------|-----------------------------------------------------------|--------------------------------------------------------------------------|-------------------------------------------------------------------------------------------------------------------------------------------------------------------------------------------------------------------|------------------------------------------------------------------------------------------------------------------|
|                  |           |                          |                          |                                                           |                                                                          |                                                                                                                                                                                                                   |                                                                                                                  |
| Care worker n. 3 | No<br>Yes | No<br>Yes<br>Do not know | No<br>Yes<br>Do not know | Female<br>Male<br>Non-binary /third gender<br>Do not know | 18-24<br>25-34<br>35-44<br>45-54<br>55-64<br>65-74<br>75+<br>Do not know | Primary<br>Secondary<br>Post-secondary vocational education (e.g., further education college, apprenticeships etc.)<br>Post secondary academic education (e.g., university)<br>Not listed or other<br>Do not know | Single (never married)<br>Married<br>In a civil union/domestic partnership<br>Divorced<br>Widowed<br>Do not know |
| Care worker n. 4 | No<br>Yes | No<br>Yes<br>Do not know | No<br>Yes<br>Do not know | Female<br>Male<br>Non-binary /third gender<br>Do not know | 18-24<br>25-34<br>35-44<br>45-54<br>55-64<br>65-74<br>75+<br>Do not know | Primary<br>Secondary<br>Post-secondary vocational education (e.g., further education college, apprenticeships etc.)<br>Post secondary academic education (e.g., university)                                       | Single (never married)<br>Married<br>In a civil union/domestic partnership<br>Divorced<br>Widowed<br>Do not know |

|  |  |  |  |  |  |                     |  |
|--|--|--|--|--|--|---------------------|--|
|  |  |  |  |  |  | Not listed or other |  |
|  |  |  |  |  |  | Do not know         |  |

**49. What is the nationality of the migrant care worker(s)?**

They are a national/citizen of:

Care worker n. 1 \_\_\_\_\_

Care worker n. 2 \_\_\_\_\_

Care worker n. 3 \_\_\_\_\_

Care worker n. 4 \_\_\_\_\_

*Skip to question 51 if you answered "yes" to question 47 and at least one paid care worker was not a migrant. If all care workers were migrant workers, skip to question 53*

**50. Please fill in a separate row in the table for each individual worker. "Migration background" refers to a person who has:**

(a) *migrated into their present country of residence; and/or*

(b) *previously had a different nationality from their present country of residence; and /*

*or*

(c) *at least one of their parents previously entered their present country of residence as a migrant.*

|                  | Employed on a live-in basis? | Migration background?    | Gender                                                    | Age                                                                      | Level of education                                                                                                                                       | Marital status                                                                                                   |
|------------------|------------------------------|--------------------------|-----------------------------------------------------------|--------------------------------------------------------------------------|----------------------------------------------------------------------------------------------------------------------------------------------------------|------------------------------------------------------------------------------------------------------------------|
| Care worker n. 1 | No<br>Yes                    | No<br>Yes<br>Do not know | Female<br>Male<br>Non-binary /third gender<br>Do not know | 18-24<br>25-34<br>35-44<br>45-54<br>55-64<br>65-74<br>75+<br>Do not know | Primary<br>Secondary<br>Post-secondary vocational education (e.g., further education college, apprenticeships etc.)<br>Post secondary academic education | Single (never married)<br>Married<br>In a civil union/domestic partnership<br>Divorced<br>Widowed<br>Do not know |

|                  |               |                                  |                                                                       |                                                                                                      |                                                                                                                                                                                                                   |                                                                                                                                      |
|------------------|---------------|----------------------------------|-----------------------------------------------------------------------|------------------------------------------------------------------------------------------------------|-------------------------------------------------------------------------------------------------------------------------------------------------------------------------------------------------------------------|--------------------------------------------------------------------------------------------------------------------------------------|
|                  |               |                                  |                                                                       |                                                                                                      | (e.g., university)<br><br>Not listed or other<br><br>Do not know                                                                                                                                                  |                                                                                                                                      |
| Care worker n. 2 | No<br><br>Yes | No<br><br>Yes<br><br>Do not know | Female<br><br>Male<br><br>Non-binary /third gender<br><br>Do not know | 18-24<br><br>25-34<br><br>35-44<br><br>45-54<br><br>55-64<br><br>65-74<br><br>75+<br><br>Do not know | Primary<br>Secondary<br>Post-secondary vocational education (e.g., further education college, apprenticeships etc.)<br>Post secondary academic education (e.g., university)<br>Not listed or other<br>Do not know | Single (never married)<br><br>Married<br><br>In a civil union/domestic partnership<br><br>Divorced<br><br>Widowed<br><br>Do not know |
| Care worker n. 3 | No<br><br>Yes | No<br><br>Yes<br><br>Do not know | Female<br><br>Male<br><br>Non-binary /third gender<br><br>Do not know | 18-24<br>25-34<br>35-44<br>45-54<br>55-64<br>65-74<br>75+<br>Do not know                             | Primary<br><br>Secondary<br><br>Post-secondary vocational education (e.g., further education college, apprenticeships etc.)                                                                                       | Single (never married)<br><br>Married<br><br>In a civil union/domestic partnership<br><br>Divorced<br><br>Widowed                    |

|                        |               |                                     |                                                                                    |                                                                                                         |                                                                                                                                                                                                                                                                                         |                                                                                                                                                             |
|------------------------|---------------|-------------------------------------|------------------------------------------------------------------------------------|---------------------------------------------------------------------------------------------------------|-----------------------------------------------------------------------------------------------------------------------------------------------------------------------------------------------------------------------------------------------------------------------------------------|-------------------------------------------------------------------------------------------------------------------------------------------------------------|
|                        |               |                                     |                                                                                    |                                                                                                         | Post<br>secondary<br>academic<br>education<br>(e.g.,<br>university)                                                                                                                                                                                                                     | Do not<br>know                                                                                                                                              |
|                        |               |                                     |                                                                                    |                                                                                                         | Not listed<br>or other                                                                                                                                                                                                                                                                  |                                                                                                                                                             |
|                        |               |                                     |                                                                                    |                                                                                                         | Do not<br>know                                                                                                                                                                                                                                                                          |                                                                                                                                                             |
| Care<br>worker n.<br>4 | No<br><br>Yes | No<br><br>Yes<br><br>Do not<br>know | Female<br><br>Male<br><br>Non-<br>binary<br>/third<br>gender<br><br>Do not<br>know | 18-24<br><br>25-34<br><br>35-44<br><br>45-54<br><br>55-64<br><br>65-74<br><br>75+<br><br>Do not<br>know | Primary<br><br>Secondary<br><br>Post-<br>secondary<br>vocational<br>education<br>(e.g.,<br>further<br>education<br>college,<br>apprentices<br>hips etc.)<br><br>Post<br>secondary<br>academic<br>education<br>(e.g.,<br>university)<br><br>Not listed<br>or other<br><br>Do not<br>know | Single<br>(never<br>married)<br><br>Married<br><br>In a civil<br>union/do<br>mestic<br>partnershi<br>p<br><br>Divorced<br><br>Widowed<br><br>Do not<br>know |

*Skip to question 52 if you answered “no” or “do not know” to question 47*

**51.** Overall, how would you rate the home care services you receive from national/local care workers?<sup>4</sup>

---

<sup>4</sup> Question not asked for Swedish participants as the question was added after ethics approval in Sweden

- ☐ Very good
- ☐ Good
- ☐ Neither good or poor
- ☐ Poor
- ☐ Very poor

*Skip to question 53 if you answered “yes” to question 47*

**52.** Overall, how would you rate the home care services you receive?<sup>5</sup>

- ☐ Very good
- ☐ Good
- ☐ Neither good or poor
- ☐ Poor
- ☐ Very poor

*Skip to question 54 if you answered “no” or “do not know” to question 42 or 47*

**53.** Overall, how would you rate the home care services you receive from migrant care workers?<sup>6</sup>

- ☐ Very good
- ☐ Good
- ☐ Neither good or poor
- ☐ Poor
- ☐ Very poor

**54. Inclusion of Other in the Self Scale (IOS) (Aron et al., 1992)**

Below there are seven pairs of circles: the level of overlap between the circles indicates how close you feel to your loved one. The greater the overlap, the closer you feel to your loved one. Please indicate the picture that best describes your relationship with your loved one.

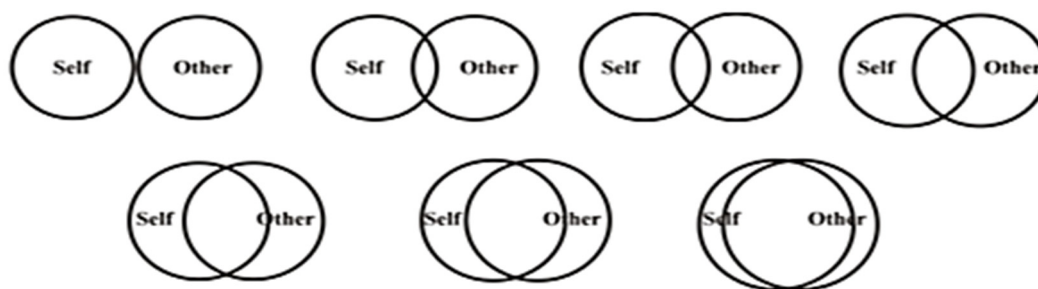

**55. Partner-Specific Communal Motivation scale (CMS) (Lemay & Neal, 2013)**

Keeping in mind your loved one, indicate the extent to which each statement applies to you.

|                                                | Not at all<br>Extremely |   |   |   |   |   |   |   |   |
|------------------------------------------------|-------------------------|---|---|---|---|---|---|---|---|
| Helping me is a high priority for my loved one | 1                       | 2 | 3 | 4 | 5 | 6 | 7 | 8 | 9 |

<sup>5</sup> Question not asked for Swedish participants as the question was added after ethics approval in Sweden

<sup>6</sup> Question not asked for Swedish participants as the question was added after ethics approval in Sweden



|                                                                |   |   |   |   |   |   |   |   |   |
|----------------------------------------------------------------|---|---|---|---|---|---|---|---|---|
| My loved one could easily put my needs out of his/her thoughts | 1 | 2 | 3 | 4 | 5 | 6 | 7 | 8 | 9 |
| My loved one cares for me                                      | 1 | 2 | 3 | 4 | 5 | 6 | 7 | 8 | 9 |
| My loved one cares about my well-being                         | 1 | 2 | 3 | 4 | 5 | 6 | 7 | 8 | 9 |
| My loved one could easily accept not helping me                | 1 | 2 | 3 | 4 | 5 | 6 | 7 | 8 | 9 |
| My loved one would sacrifice very much to help me              | 1 | 2 | 3 | 4 | 5 | 6 | 7 | 8 | 9 |
| My loved one would incur a large cost in order to help me      | 1 | 2 | 3 | 4 | 5 | 6 | 7 | 8 | 9 |
| My loved one cares for my needs                                | 1 | 2 | 3 | 4 | 5 | 6 | 7 | 8 | 9 |
| My loved one would go out of his/her way to help me            | 1 | 2 | 3 | 4 | 5 | 6 | 7 | 8 | 9 |
| My loved one would be reluctant to sacrifice for me            | 1 | 2 | 3 | 4 | 5 | 6 | 7 | 8 | 9 |

#### 56. Willingness to care scale (WTC) (Abell, 2001)

Receiving care from your loved one can sometimes be a difficult experience. Your loved ones may differ in the tasks they feel able to perform as well as you may differ in your willingness to accept a particular type of care task.

Please read each of the following questions and rate the extent to which you are willing or not to receive help from your loved one for each of these tasks.

How willing are you to accept:

|                                                                                                                                                                                  |                      |                    |          |                  |                    |
|----------------------------------------------------------------------------------------------------------------------------------------------------------------------------------|----------------------|--------------------|----------|------------------|--------------------|
| instrumental help from your loved one? (e.g. having your meals prepared by your loved one, having your dishes washed, having your house cleaned, having your laundry done, etc.) | Completely unwilling | Somewhat unwilling | Not sure | Somewhat willing | Completely willing |
| emotional help from your loved one? (e.g. being listened by your loved one when you're sad, being encouraged by them when you feel hopeless, etc.)                               |                      |                    |          |                  |                    |
| nursing help from your loved one? (e.g. helping you with dressing, feeding, washing, toileting, taking medicine, etc.)                                                           |                      |                    |          |                  |                    |

### 57. The World Health Organisation-Five Well-Being Index (WHO-5)

|          | <i>Over the last two weeks</i>                             | All of the time | Most of the time | More than half of the time | Less than half of the time | Some of the time | At no time |
|----------|------------------------------------------------------------|-----------------|------------------|----------------------------|----------------------------|------------------|------------|
| <b>1</b> | I have felt cheerful and in good spirits                   | 5               | 4                | 3                          | 2                          | 1                | 0          |
| <b>2</b> | I have felt calm and relaxed                               | 5               | 4                | 3                          | 2                          | 1                | 0          |
| <b>3</b> | I have felt active and vigorous                            | 5               | 4                | 3                          | 2                          | 1                | 0          |
| <b>4</b> | I woke up feeling fresh and rested                         | 5               | 4                | 3                          | 2                          | 1                | 0          |
| <b>5</b> | My daily life has been filled with things that interest me | 5               | 4                | 3                          | 2                          | 1                | 0          |

### 58. EQ-5D-5L

**Please select the ONE box that best describes your health TODAY.**

MOBILITY

- ☐ I have no problems in walking about
- ☐ I have slight problems in walking about
- ☐ I have moderate problems in walking about
- ☐ I have severe problems in walking about
- ☐ I am unable to walk about

**Please select the ONE box that best describes your health TODAY.**

SELF-CARE

- ☐ I have no problems washing or dressing myself
- ☐ I have slight problems washing or dressing myself
- ☐ I have moderate problems washing or dressing myself
- ☐ I have severe problems washing or dressing myself
- ☐ I am unable to wash or dress myself

**Please select the ONE box that best describes your health TODAY.**

USUAL ACTIVITIES (e.g. work, study, housework, family or leisure activities)

- ☐ I have no problems doing my usual activities
- ☐ I have slight problems doing my usual activities
- ☐ I have moderate problems doing my usual activities
- ☐ I have severe problems doing my usual activities
- ☐ I am unable to do my usual activities

**Please select the ONE box that best describes your health TODAY.**

PAIN / DISCOMFORT

- ☐ I have no pain or discomfort
- ☐ I have slight pain or discomfort
- ☐ I have moderate pain or discomfort
- ☐ I have severe pain or discomfort
- ☐ I have extreme pain or discomfort

**Please select the ONE box that best describes your health TODAY.**  
ANXIETY / DEPRESSION

- ☐ I am not anxious or depressed
- ☐ I am slightly anxious or depressed
- ☐ I am moderately anxious or depressed
- ☐ I am severely anxious or depressed
- ☐ I am extremely anxious or depressed

**59. VAS**

**We would like to know how good or bad your health is TODAY.**

This scale is numbered from 0 to 100.

100 means the best health you can imagine. 0 means the worst health you can imagine.

Please indicate on the scale how your health is TODAY.

Best  
imaginable  
health state

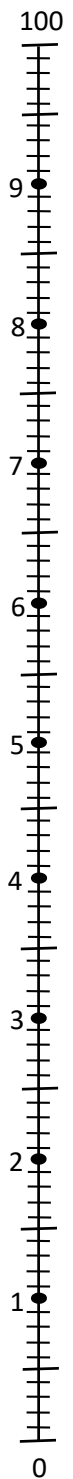

Worst  
imaginable  
health state

**60. 10-item Center for Epidemiologic Studies Depression Scale (CESD-10 )** (Andersen et al., 1994)

Below is a list of the ways you might have felt or behaved. Please indicate how often you have felt this way during the past week.

|                                                       | <b>Rarely or none of the time (less than 1 day)</b> | <b>Some or a little of the time (1-2 days)</b> | <b>Occasionally or a moderate amount of time (3-4 days)</b> | <b>All of the time (5-7 days)</b> |
|-------------------------------------------------------|-----------------------------------------------------|------------------------------------------------|-------------------------------------------------------------|-----------------------------------|
| I was bothered by things that usually don't bother me |                                                     |                                                |                                                             |                                   |
| I had trouble keeping my mind on what I was doing     |                                                     |                                                |                                                             |                                   |
| I felt depressed                                      |                                                     |                                                |                                                             |                                   |
| I felt that everything I did was an effort            |                                                     |                                                |                                                             |                                   |
| I felt hopeful about the future                       |                                                     |                                                |                                                             |                                   |
| I felt fearful                                        |                                                     |                                                |                                                             |                                   |
| My sleep was restless                                 |                                                     |                                                |                                                             |                                   |
| I was happy                                           |                                                     |                                                |                                                             |                                   |
| I felt lonely                                         |                                                     |                                                |                                                             |                                   |
| I could not "get going"                               |                                                     |                                                |                                                             |                                   |

**61. Dyadic Relationship Scale (DRS)** (Sebern et al. 2007)

This series of questions address some of the difficulties that people face as they receive care from a relative. We would like to know how receiving care from your loved one has affected your relationship with them during the past week. How much do you agree or disagree with the following statements?

|                                                       | <b>Strongly agree</b> | <b>Agree</b> | <b>Neutral</b> | <b>Disagree</b> | <b>Strongly disagree</b> |
|-------------------------------------------------------|-----------------------|--------------|----------------|-----------------|--------------------------|
| <b>Because of helping my loved one:</b>               |                       |              |                |                 |                          |
| I felt closer to my loved one than I have in a while. |                       |              |                |                 |                          |
| I have learned some good things about my loved one.   |                       |              |                |                 |                          |

|                                                                           |  |  |  |  |  |
|---------------------------------------------------------------------------|--|--|--|--|--|
| I felt angry toward my loved one.                                         |  |  |  |  |  |
| I felt depressed because of my relationship with my loved one.            |  |  |  |  |  |
| I felt resentful toward my loved one.                                     |  |  |  |  |  |
| I have had more patience than I have had in the past.                     |  |  |  |  |  |
| I have learned some good things about myself.                             |  |  |  |  |  |
| I felt that my relationship with my loved one was strained.               |  |  |  |  |  |
| I have learned some nice things about other people in my life.            |  |  |  |  |  |
| Communication between my loved one and me has improved.                   |  |  |  |  |  |
| I felt that my loved one made requests over and above what he/she needed. |  |  |  |  |  |

## 62. Relationship Assessment Scale - 1 item (Hendrick, 1988)

|                                                                               | <b>Not satisfied<br/>1</b> | <b>2</b> | <b>3</b> | <b>4</b> | <b>Very satisfied<br/>5</b> |
|-------------------------------------------------------------------------------|----------------------------|----------|----------|----------|-----------------------------|
| In general, how satisfied are you with your relationship with your loved one? |                            |          |          |          |                             |

## Module 1

### 63. Revised Familism Scale (RFS) (Losada et al., 2020)

The following questions examine family relationships. Please rate on the scale how much you agree or disagree with each statement:

|  | <b>Strongly disagree</b> | <b>Disagree</b> | <b>Neither agree nor disagree</b> | <b>Agree</b> | <b>Strongly agree</b> |
|--|--------------------------|-----------------|-----------------------------------|--------------|-----------------------|
|  |                          |                 |                                   |              |                       |

|                                                                                                   |  |  |  |  |  |
|---------------------------------------------------------------------------------------------------|--|--|--|--|--|
| 1 - One should make great sacrifices in order to guarantee a good education for his/her children. |  |  |  |  |  |
| 2 - I would help within my means if a relative told me that they are in financial difficulty.     |  |  |  |  |  |
| 3 - One should have the hope of living long enough to see his/her grandchildren grow up.          |  |  |  |  |  |
| 4 - A person should share his/her home with uncles, aunts or first cousins if they are in need.   |  |  |  |  |  |
| 5 - When someone has problems s/he can count on the help of relatives. (Generally)                |  |  |  |  |  |
| 6 - When one has problems, one can count on the help of relatives. (Oneself/In relation to self)  |  |  |  |  |  |
| 7 - One can count on help from his/her relatives to solve most problems.                          |  |  |  |  |  |
| 8 - Much of what a son or daughter does should be done to please the parents.                     |  |  |  |  |  |
| 9 - The family should consult close relatives (uncles, aunts) concerning its important decisions. |  |  |  |  |  |
| 10 - One should be embarrassed about the bad things done by his/her brothers or sisters.          |  |  |  |  |  |

|                                                                                                                                                                                  |  |  |  |  |  |
|----------------------------------------------------------------------------------------------------------------------------------------------------------------------------------|--|--|--|--|--|
| 11 - Children should live in their parents' house until they get married.                                                                                                        |  |  |  |  |  |
| 12 - A person should help his or her elderly parents in times of need, for example, help financially or share a house.                                                           |  |  |  |  |  |
| 13 - A person should live near his or her parents and spend time with them on a regular basis.                                                                                   |  |  |  |  |  |
| 14 - A person should always support members of the extender family, for example, aunts, uncles, and in-laws, if they are in need even if it is a big sacrifice.                  |  |  |  |  |  |
| 15 - A person should respect his or her older brothers and sisters regardless of their differences in views.                                                                     |  |  |  |  |  |
| 16 - A person should be a good person for the sake of his or her family.                                                                                                         |  |  |  |  |  |
| 17 - Children should obey their parents without question even if they believe they are wrong.                                                                                    |  |  |  |  |  |
| 18 - Parents and grandparents should be treated with great respect regardless of their differences in views                                                                      |  |  |  |  |  |
| 19 - A person should often do activities with his or her immediate and extended families, for example, eat meals, play games, go somewhere together, or work on things together. |  |  |  |  |  |





|                                                                                                                                                                |   |   |   |   |   |   |   |   |                                |  |
|----------------------------------------------------------------------------------------------------------------------------------------------------------------|---|---|---|---|---|---|---|---|--------------------------------|--|
| <p><b><i>How concerned are you about your illness?</i></b></p>                                                                                                 |   |   |   |   |   |   |   |   |                                |  |
| 1                                                                                                                                                              | 2 | 3 | 4 | 5 | 6 | 7 | 8 | 9 | 10                             |  |
| not at all concerned                                                                                                                                           |   |   |   |   |   |   |   |   | extremely concerned            |  |
| <p><b><i>How well do you feel you understand your illness?</i></b></p>                                                                                         |   |   |   |   |   |   |   |   |                                |  |
| 1                                                                                                                                                              | 2 | 3 | 4 | 5 | 6 | 7 | 8 | 9 | 10                             |  |
| don't understand at all                                                                                                                                        |   |   |   |   |   |   |   |   | understand very clearly        |  |
| <p><b><i>How much does your illness affect you emotionally? (e.g. does it make you angry, scared, upset or depressed)?</i></b></p>                             |   |   |   |   |   |   |   |   |                                |  |
| 1                                                                                                                                                              | 2 | 3 | 4 | 5 | 6 | 7 | 8 | 9 | 10                             |  |
| not at all affected emotionally                                                                                                                                |   |   |   |   |   |   |   |   | extremely affected emotionally |  |
| <p><b><i>Please list in rank-order the three most important factors that you believe caused <u>your</u> illness. The most important causes for me:</i></b></p> |   |   |   |   |   |   |   |   |                                |  |
| <p>1. _</p> <p>2. _</p> <p>3. _</p>                                                                                                                            |   |   |   |   |   |   |   |   |                                |  |

### 65. Meaning in Life Questionnaire (MLQ) (Steger et al., 2006)

Please take a moment to think about what makes your life and existence feel important and significant to you. Please respond to the following statements as truthfully and accurately as you can, and also please remember that these are very subjective questions and that there are no right or wrong answers. Please answer according to the scale below:

|                                                                                                   | Absolutel<br>y untrue | Mostly<br>Untru<br>e | Somewha<br>t Untrue | Can't<br>Say True<br>or False | Somewha<br>t True | Mostly<br>True | Absolutel<br>y True |
|---------------------------------------------------------------------------------------------------|-----------------------|----------------------|---------------------|-------------------------------|-------------------|----------------|---------------------|
| I understand my life's meaning.<br>I am looking for something that makes my life feel meaningful. |                       |                      |                     |                               |                   |                |                     |

|                                                                          |  |  |  |  |  |  |  |
|--------------------------------------------------------------------------|--|--|--|--|--|--|--|
|                                                                          |  |  |  |  |  |  |  |
| I am always looking to find my life's purpose.                           |  |  |  |  |  |  |  |
| My life has a clear sense of purpose.                                    |  |  |  |  |  |  |  |
| I have a good sense of what makes my life meaningful.                    |  |  |  |  |  |  |  |
| I have discovered a satisfying life purpose.                             |  |  |  |  |  |  |  |
| I am always searching for something that makes my life feel significant. |  |  |  |  |  |  |  |
| I am seeking a purpose or mission for my life.                           |  |  |  |  |  |  |  |
| My life has no clear purpose.                                            |  |  |  |  |  |  |  |
| I am searching for meaning in my life.                                   |  |  |  |  |  |  |  |

# 66. Portrait Values Questionnaire (PVQ-21) (Schwartz et al., 2001)

Here we briefly describe some people. Please read each description and think about how much each person is or is not like you.

How much is this person like you?

|                                                                                                                                                             | <b>very<br/>much<br/>like me</b> | <b>like me</b> | <b>somew<br/>hat<br/>like<br/>me</b> | <b>a little<br/>like<br/>me</b> | <b>not<br/>like<br/>me</b> | <b>not<br/>like<br/>me at<br/>all</b> |
|-------------------------------------------------------------------------------------------------------------------------------------------------------------|----------------------------------|----------------|--------------------------------------|---------------------------------|----------------------------|---------------------------------------|
| It is important to him/her to be rich. He/she wants to have a lot of money and expensive things.                                                            |                                  |                |                                      |                                 |                            |                                       |
| He/she thinks it is important that every person in the world should be treated equally. He/she believes everyone should have equal opportunities in life.   |                                  |                |                                      |                                 |                            |                                       |
| It's very important to him/her to show his/her abilities. He/she wants people to admire what he/she does.                                                   |                                  |                |                                      |                                 |                            |                                       |
| It is important to him/her to listen to people who are different from him/her. Even when he/she disagrees with them, he/she still wants to understand them. |                                  |                |                                      |                                 |                            |                                       |
| It's very important to him/her to help the people around him/her. He/she wants to care for their well-being.                                                |                                  |                |                                      |                                 |                            |                                       |
| Being very successful is important to him/her. He/she hopes people will recognize his/her achievements.                                                     |                                  |                |                                      |                                 |                            |                                       |
| It is important to him/her to get respect from others. He/She wants people to do what he/she says.                                                          |                                  |                |                                      |                                 |                            |                                       |
| It is important to him/her to be loyal to his/her friends. He/she wants to devote himself/herself to people close to him/her.                               |                                  |                |                                      |                                 |                            |                                       |
| He/she strongly believes that people should care for nature. Looking after the environment is important to him/her.                                         |                                  |                |                                      |                                 |                            |                                       |

## Module 2

67. Over the past 3 months, how often did you feel that your loved one lacks information about your health condition?

For example, information about the course of your condition, medical care, medical exams results, etc.

- ☐ Never
- ☐ Rarely
- ☐ Sometimes
- ☐ Often
- ☐ Always

68. Over the past 3 months, how often did you feel that your loved one is not able to continue caring for you, due to your transportation needs?

Transportation needs refer to the assistance you might receive from your loved one to get to the services you use or activities (e.g. medical services, shopping or errands, recreational activities, family or personal business, religious activities etc.), for example by driving you or helping you with using public transportation.

- ☐ Never
- ☐ Rarely
- ☐ Sometimes
- ☐ Often
- ☐ Always

69. Do you feel that your transportation needs, negatively impact your loved one's personal daily activities?

For example, housework, shopping, social outings, religious activities etc.

- ☐ Not at all
- ☐ A little
- ☐ Somewhat
- ☐ A lot

*Skip to Question 75 if you answered “no” to question 36*

Here are some questions about your living arrangements and the geographic distance between you and your loved one. Please read each of the questions carefully and choose the answer that best applies to you.

70. Over the past month, how often did your loved one visit you?

- ☐ Daily
- ☐ More than once a week
- ☐ Once a week
- ☐ Less than once a week

71. Do you think that the geographic distance between you and your loved one, is a barrier to their investment in your care?

- ☐ Not at all
- ☐ A little
- ☐ Somewhat
- ☐ A lot

72. Do you think that the travel time your loved one needs to get to you, negatively impacts their daily activities?

For example, housework, shopping, social outings, religious activities, etc.

- ☐ Not at all
- ☐ A little
- ☐ Somewhat
- ☐ A lot

73. Over the past 3 months, how often did you feel that your loved one is not able to continue caring for you, because you don't live together?

- ☐ Never
- ☐ Rarely
- ☐ Sometimes
- ☐ Often
- ☐ Always

74. Do you feel that the geographic distance between you and your loved one, negatively impacts your relationship with them?

- ☐ Not at all
- ☐ A little
- ☐ Somewhat
- ☐ A lot

**75. The Relationship Structures Questionnaire of the Experiences in Close Relationships - Revised (ECR-RS)**

(Fraley et al., 2011)

**Please read each of the following statements carefully and rate the extent to which you believe each statement best describes your feelings about your loved one.**

It helps to turn to my loved one in times of need.

**strongly disagree 1 2 3 4 5 6 7 strongly agree**

I usually discuss my problems and concerns with my loved one.

**strongly disagree 1 2 3 4 5 6 7 strongly agree**

I talk things over with my loved one.

**strongly disagree 1 2 3 4 5 6 7 strongly agree**

I find it easy to depend on my loved one.

**strongly disagree 1 2 3 4 5 6 7 strongly agree**

I don't feel comfortable opening up to my loved one.

**strongly disagree 1 2 3 4 5 6 7 strongly agree**

I prefer not to show my loved one how I feel deep down.

**strongly disagree 1 2 3 4 5 6 7 strongly agree**

I often worry that my loved one doesn't really care for me.

**strongly disagree 1 2 3 4 5 6 7 strongly agree**

I'm afraid that my loved one may abandon me.

**strongly disagree 1 2 3 4 5 6 7 strongly agree**

I worry that my loved one won't care about me as much as I care about them.

**strongly disagree 1 2 3 4 5 6 7 strongly agree**

---

**76. The Pearlin Mastery Scale (Pearlin & Schooler, 1978)**

**On a scale of 1 to 4 with 1 meaning "Strongly Disagree" and 4 meaning "Strongly Agree", how strongly do you agree or disagree with these statements about yourself?**

|                                                                             | <b>Strong Disagree</b> | <b>Disagree</b> | <b>Agree</b> | <b>Strongly Agree</b> |
|-----------------------------------------------------------------------------|------------------------|-----------------|--------------|-----------------------|
| There is really no way I can solve some of the problems I have.             |                        |                 |              |                       |
| Sometimes I feel that I'm being pushed around in life.                      |                        |                 |              |                       |
| I have little control over the things that happen to me.                    |                        |                 |              |                       |
| I can do just about anything I really set my mind to.                       |                        |                 |              |                       |
| I often feel helpless in dealing with the problems of life.                 |                        |                 |              |                       |
| What happens to me in the future mostly depends on me.                      |                        |                 |              |                       |
| There is little I can do to change many of the important things in my life. |                        |                 |              |                       |

#### **77. Big-Five Inventory Extra Short Form (BFI-2-XS) (Soto & John, 2017)**

**Here are a number of characteristics that may or may not apply to you. For example, do you agree that you are someone who likes to spend time with others? Please read each of the statements carefully and rate the extent to which you agree or disagree.**

**I am someone who...**

|                    | <b>Disagree strongly</b> | <b>Disagree a little</b> | <b>Neutral; no opinion</b> | <b>Agree a little</b> | <b>Agree strongly</b> |
|--------------------|--------------------------|--------------------------|----------------------------|-----------------------|-----------------------|
| Tends to be quiet. |                          |                          |                            |                       |                       |

|                                             |  |  |  |  |  |
|---------------------------------------------|--|--|--|--|--|
| Is compassionate, has a soft heart.         |  |  |  |  |  |
| Tends to be disorganized.                   |  |  |  |  |  |
| Worries a lot.                              |  |  |  |  |  |
| Is fascinated by art, music, or literature. |  |  |  |  |  |
| Is dominant, acts as a leader.              |  |  |  |  |  |
| Is sometimes rude to others.                |  |  |  |  |  |
| Has difficulty getting started on tasks.    |  |  |  |  |  |
| Tends to feel depressed, blue.              |  |  |  |  |  |
| Has little interest in abstract ideas.      |  |  |  |  |  |
| Is full of energy.                          |  |  |  |  |  |
| Assumes the best about people.              |  |  |  |  |  |
| Is reliable, can always be counted on.      |  |  |  |  |  |
| Is emotionally stable, not easily upset.    |  |  |  |  |  |
| Is original, comes up with new ideas.       |  |  |  |  |  |

**78. Toronto Empathy Questionnaire (TEQ) (Spreng et al., 2009)**

**Below is a list of statements. Please read each of the statements carefully and rate how frequently you feel or act in the manner described. There are no right or wrong answers or trick questions. Please answer each question as honestly as you can.**

|                                              | Never | Rarely | Sometimes | Often | Always |
|----------------------------------------------|-------|--------|-----------|-------|--------|
| When someone else is feeling excited, I tend |       |        |           |       |        |



|                                                                                                              |  |  |  |  |  |
|--------------------------------------------------------------------------------------------------------------|--|--|--|--|--|
| to get excited too.                                                                                          |  |  |  |  |  |
| Other people's misfortunes do not disturb me a great deal.                                                   |  |  |  |  |  |
| It upsets me to see someone being treated disrespectfully.                                                   |  |  |  |  |  |
| I remain unaffected when someone close to me is happy.                                                       |  |  |  |  |  |
| I enjoy making other people feel better.                                                                     |  |  |  |  |  |
| I have tender, concerned feelings for people less fortunate than me.                                         |  |  |  |  |  |
| When a friend starts to talk about his/her problems, I try to steer the conversation towards something else. |  |  |  |  |  |
| I can tell when others are sad even when they do not say anything.                                           |  |  |  |  |  |

|                                                                                         |  |  |  |  |  |
|-----------------------------------------------------------------------------------------|--|--|--|--|--|
| I find that I am “in tune” with other people’s moods.                                   |  |  |  |  |  |
| I do not feel sympathy for people who cause their own serious illnesses.                |  |  |  |  |  |
| I become irritated when someone cries.                                                  |  |  |  |  |  |
| I am not really interested in how other people feel.                                    |  |  |  |  |  |
| I get a strong urge to help when I see someone who is upset.                            |  |  |  |  |  |
| When I see someone being treated unfairly, I do not feel very much pity for them.       |  |  |  |  |  |
| I find it silly for people to cry out of happiness.                                     |  |  |  |  |  |
| When I see someone being taken advantage of, I feel kind of protective towards him/her. |  |  |  |  |  |

---

## Module 3

### 79. Perception of Collaboration Questionnaire (PCQ) (Berg et al., 2008)

Here are some questions about perceptions of collaboration between you and your loved one. Please indicate the extent to which you agree or disagree with that statement

|                                                                                                                              | Strongly disagree | Disagree | Neutral | Agree | Strongly agree |
|------------------------------------------------------------------------------------------------------------------------------|-------------------|----------|---------|-------|----------------|
| I view working together with my loved one as necessary as it is harder for me to solve problems and make decisions by myself |                   |          |         |       |                |
| I make better decisions when my loved one and I work together                                                                |                   |          |         |       |                |
| My loved one and I always work together to deal with care-related decisions                                                  |                   |          |         |       |                |
| Nearly every day my loved one and I work together to make care-related decisions                                             |                   |          |         |       |                |
| It is rare for my loved one and I to share care-related tasks and make                                                       |                   |          |         |       |                |

|                                                                                                     |  |  |  |  |  |
|-----------------------------------------------------------------------------------------------------|--|--|--|--|--|
| decisions together                                                                                  |  |  |  |  |  |
| I enjoy the support and encouragement I receive when I work together with my loved one              |  |  |  |  |  |
| Working together with my loved one is useful as he/she makes up for things that I don't do well     |  |  |  |  |  |
| Solving everyday problems and making decisions together with my loved one brings us closer together |  |  |  |  |  |
| I dislike getting my loved one's assistance as it makes me feel incompetent                         |  |  |  |  |  |

#### 80. Dyadic Coping Inventory (DCI) - stress communication subscale (Bodenmann, 2000)

Please respond to any item by marking the appropriate case, which is fitting to your personal situation.

This section is about how you communicate your stress with your loved one:

|                                                                      | Very rarely | Rarely | Sometimes | Often | Very often |
|----------------------------------------------------------------------|-------------|--------|-----------|-------|------------|
| I let my loved one know that I appreciate his/her practical support, |             |        |           |       |            |

|                                                                                           |  |  |  |  |  |
|-------------------------------------------------------------------------------------------|--|--|--|--|--|
| advice, or help                                                                           |  |  |  |  |  |
| I ask my loved one to do things for me when I have too much to do                         |  |  |  |  |  |
| I show my loved one through my behaviour when I am not doing well or when I have problems |  |  |  |  |  |
| I tell my loved one openly how I feel and that I would appreciate his/her support         |  |  |  |  |  |

This section is about how your loved one communicates when he/she is feeling stressed:

|                                                                                         | Very rarely | Rarely | Sometimes | Often | Very often |
|-----------------------------------------------------------------------------------------|-------------|--------|-----------|-------|------------|
| My loved one lets me know that he/she appreciates my practical support, advice, or help |             |        |           |       |            |
| My loved one asks me to do things for him/her when he/she has too much to do            |             |        |           |       |            |
| My loved one shows me through his/her                                                   |             |        |           |       |            |

|                                                                                           |  |  |  |  |  |
|-------------------------------------------------------------------------------------------|--|--|--|--|--|
| behaviour that he/she is not doing well or when he/she has problems                       |  |  |  |  |  |
| My loved one tells me openly how he/she feels and that he/she would appreciate my support |  |  |  |  |  |

### 81. Mutuality scale (MS) (Archbold et al., 1990)

Now we would like you to let us know how you and your loved one feel about each other at the current time.

|                                                                                              | Not at all | A little | Some | Quite a bit | A great deal |
|----------------------------------------------------------------------------------------------|------------|----------|------|-------------|--------------|
| To what extent do the two of you see eye to eye (agree on things)?                           |            |          |      |             |              |
| How close do you feel to your loved one?                                                     |            |          |      |             |              |
| How much do you enjoy sharing past experiences with your loved one?                          |            |          |      |             |              |
| How much does your loved one express feelings of appreciation for you and the things you do? |            |          |      |             |              |

|                                                                    |  |  |  |  |  |
|--------------------------------------------------------------------|--|--|--|--|--|
| How attached are you to your loved one?                            |  |  |  |  |  |
| How much does your loved one help you?                             |  |  |  |  |  |
| How much do you like to sit and talk with your loved one?          |  |  |  |  |  |
| How much love do you feel for your loved one?                      |  |  |  |  |  |
| To what extent do the two of you share the same values?            |  |  |  |  |  |
| When you really need it, how much does your loved one comfort you? |  |  |  |  |  |
| How much do the two of you laugh together?                         |  |  |  |  |  |
| How much do you confide in your loved one?                         |  |  |  |  |  |
| How much emotional support does your loved one give you?           |  |  |  |  |  |





|                                                             |  |  |  |  |  |  |  |  |  |
|-------------------------------------------------------------|--|--|--|--|--|--|--|--|--|
| values and respects the whole package that is the "real" me |  |  |  |  |  |  |  |  |  |
| expresses liking and encouragement for me                   |  |  |  |  |  |  |  |  |  |
| seems interested in what I am thinking and feeling          |  |  |  |  |  |  |  |  |  |
| values my abilities and opinions                            |  |  |  |  |  |  |  |  |  |

### 83. Social Support List (SSL) (Kempen & Van Eijk, 1995; Van Sonderen, 1993)

The next questions concern the help and support you provide to your loved one. Please keep your loved one in mind.

How often do you:

|                                                  | Seldom or never | Now and then | Quite often | Very often |
|--------------------------------------------------|-----------------|--------------|-------------|------------|
| Provide attention to your loved one              |                 |              |             |            |
| Provide support to your loved one                |                 |              |             |            |
| Show that you appreciate your loved one          |                 |              |             |            |
| Provide instrumental support to your loved one   |                 |              |             |            |
| Keep your loved one company                      |                 |              |             |            |
| Provide information and advice to your loved one |                 |              |             |            |

|                                                   |  |  |  |  |
|---------------------------------------------------|--|--|--|--|
| React in a distant manner to your loved one       |  |  |  |  |
| Do not keep your appointments with your loved one |  |  |  |  |
| Make disapproving remarks to your loved one       |  |  |  |  |
| Blame or holding things against your loved one    |  |  |  |  |
| Treat your loved one unfairly                     |  |  |  |  |
| Make unreasonable demands to your loved one       |  |  |  |  |
| Interfere too much with your loved one            |  |  |  |  |

The next questions concern the help and support you receive from your loved one. Please keep your loved one in mind.

How often does your loved one:

|                                     | Seldom or never | Now and then | Quite often | Very often |
|-------------------------------------|-----------------|--------------|-------------|------------|
| Provide attention to you            |                 |              |             |            |
| Provide support to you              |                 |              |             |            |
| Show that he/she appreciates you    |                 |              |             |            |
| Provide instrumental support to you |                 |              |             |            |
| Keep you company                    |                 |              |             |            |

|                                            |  |  |  |  |
|--------------------------------------------|--|--|--|--|
| Provide information and advice to you      |  |  |  |  |
| React in a distant manner to you           |  |  |  |  |
| Do not keep his/her appointments with you  |  |  |  |  |
| Make disapproving remarks to you           |  |  |  |  |
| Blame or holding things against you        |  |  |  |  |
| Treat you unfairly                         |  |  |  |  |
| Make unreasonable demands to you           |  |  |  |  |
| Interfere too much with you your loved one |  |  |  |  |

## Module 4

**84.** Do you provide financial compensation to your loved one for the care that you are provided with?

- ☐ No  
☐ Yes: \_\_\_\_\_ net per month.

**85.** Do you provide financial compensation to another family member for the care that you are provided with?

- ☐ No  
☐ Yes: \_\_\_\_\_ net per month.

**86.** Do you receive any of the following benefits?

| Benefit                                                                                                                                                                                                                                                                                       | Do you receive this?<br>Yes/No | Approx. amount per month |
|-----------------------------------------------------------------------------------------------------------------------------------------------------------------------------------------------------------------------------------------------------------------------------------------------|--------------------------------|--------------------------|
| Cash benefits (i.e. care allowance, personal budget, attendance allowance, cash domiciliary allowance, personal assistance benefits, sickness benefits, disability/invalidity/incapacity benefits, or any other cash benefits you might have received to help you pay for the care you need). |                                |                          |
| Tax benefits such as exemptions, deductions, and credits (i.e council tax reduction, deductions from income tax, etc.)                                                                                                                                                                        |                                |                          |
| Voucher programs (service vouchers)                                                                                                                                                                                                                                                           |                                |                          |

*Skip to question 91 if you answered no to question 40*

*Skip to question 90 if you selected “no” or “do not know” to question 42 or 47*

**87. Were you involved in the decision to hire a migrant worker?**

- ☐ No  
☐ Yes

**88. Why was it decided to hire a migrant worker?**

Please select all that apply.

- ☐ Economically convenient  
☐ It is useful for both myself and my loved one  
☐ Migrant workers provide care tasks that local staff are not able to provide (for example late night shifts/weekends).  
☐ It is common practice  
☐ To avoid living in a residential facility  
☐ Do not know  
☐ If Other, please specify \_\_\_\_\_

**89. How did you access services by a migrant care worker?<sup>7</sup>**

Please select all that apply

- ☐ Through recommendations from family or friends  
☐ Through a care or recruitment agency  
☐ Through a church or religious organization  
☐ Through a government programme

---

<sup>7</sup> Question not asked to participants in Sweden as the question was added after ethics approval in Sweden

- ☐ Through a non-profit organization
- ☐ Through social media
- ☐ Other, please specify:

*Skip to question 91 if you selected “yes” to question 42 or 47*

**90.** Why was it decided not to hire a migrant worker?

Please select all that apply.

- ☐ I would not trust a migrant worker to take care of me
- ☐ Not able to afford this service
- ☐ I prefer that the care worker is a national citizen
- ☐ My loved one refused this solution
- ☐ Do not know
- ☐ If Other, please specify

**91.** The next questions will ask about the services that you may have used in the 6 months.

Which of the following services have you received or accessed in the past 6 months?

Select all that apply.

| Name of service                                           | Have you received (the service) in the past 6 months? | How many times have you used this service in the past 6 months? |
|-----------------------------------------------------------|-------------------------------------------------------|-----------------------------------------------------------------|
| Emotional, psychological or social support service        |                                                       |                                                                 |
| Occupational therapy (in the home or at a clinic).        |                                                       |                                                                 |
| Physiotherapy (in the home or at a clinic)                |                                                       |                                                                 |
| Medical and nursing services (in the home or at a clinic) |                                                       |                                                                 |
| Transport services                                        |                                                       |                                                                 |
| Organizing and managing care and support                  |                                                       |                                                                 |

|                                                                                                                                                                                                                           |  |  |
|---------------------------------------------------------------------------------------------------------------------------------------------------------------------------------------------------------------------------|--|--|
| <p>Telecare (i.e alarm buttons, help lines, bed monitors, video communication systems, fall and movement detectors, smartphone apps or any other technologies that assist your loved one to continue living at home).</p> |  |  |
|---------------------------------------------------------------------------------------------------------------------------------------------------------------------------------------------------------------------------|--|--|

**92.** *Skip to question 93 if you did not select any services in question 91.*

Of those services you have used which would you rate as the most important to you?

- ☐ Emotional, psychological or social support service
- ☐ Occupational therapy
- ☐ Physiotherapy
- ☐ Medical and nursing
- ☐ Services Transport services
- ☐ Organizing and managing care and support
- ☐ Telecare

**93.** Have you used any assistive devices/aids (devices and aids that help you live more independently such as communication systems, mobility aids, help lines, smartphone apps, etc.)?

- ☐ No
- ☐ Yes

**94.** Have you been in a daycare facility or a residential or nursing home in the past 6 months?

- ☐ No
- ☐ Yes

The next questions will ask about any financial costs that you may have had as a result of your need for help. These will be called “out-of-pocket” expenses. Please do not count expenses that are covered or reimbursed by a health or social insurance.

*Skip to question 97 if you answered “no” to question 40*

95. In the last six months, did you pay anything yourself for the paid or professional help you receive in your home without getting reimbursed by your health or long-term care insurance?

- ☐ No (skip to question 97)
- ☐ Yes

96. How much do you pay in a typical month for personal care, domestic tasks, meals on wheels or other help you receive in your own home?

\_\_\_\_\_

*Skip to question 99 if you answered “no” to question 94 or did not select “In a nursing care or long-term care facility” for question 37*

97. In the last six months, did you pay anything yourself for nursing home and/or daycare facility stays without getting reimbursed by your health or long-term care insurance?

- ☐ No (skip to question 99)
- ☐ Yes

*Skip to question 101 if you answered “no” to question 9*

98. Can you tell me about how much you pay in a typical month for your nursing home and/or daycare facility stays?

\_\_\_\_\_

99. Skip to question 101 if you answered “no” to question 93

In the last six months, did you pay anything yourself for assistive devices and aids without getting reimbursed by your health or long-term care insurance?

- ☐ No (skip to question 101)
- ☐ Yes

100. Can you tell me about how much you pay in a typical month for assistive devices and aids?

\_\_\_\_\_

101. Have you had any assistance in filling out the survey?

- ☐ No
- ☐ Yes, my loved one helped me fill in the survey
- ☐ Yes, someone other than my loved one helped me fill in the survey

**Thank you for completing our survey.**

We very much appreciate the information that you have provided and your time taken in completing this survey.

You can find the latest updates on our project at: <https://www.entwine-icohort.eu>

If you have any further questions on the survey, please send us an email at:  
[entwinestudy@bangor.ac.uk](mailto:entwinestudy@bangor.ac.uk)
