# Supplementary material for: A Multinational Longitudinal Study Incorporating Intensive Methods to Examine Caregiver Experiences in the Context of Chronic Health Conditions: Protocol of the ENTWINE-iCohort
Source: Int J Environ Res Public Health. 2022 Jan 12;19(2):821. doi: 10.3390/ijerph19020821 (PMC8775526; doi:10.3390/ijerph19020821)
Supplement: Supplementary file 1 [file ijerph-19-00821-s001.zip]

Archive with 11 entries (11 files):
- Supplementary File S1. ENTWINE-iCohort exemplary fliers (1¿C3).jpg
- Supplementary File S10. Consent to be contacted for future studies.pdf
- Supplementary File S11. Participant Consent Form to be contacted for future studies; Eligibility Survey.pdf
- Supplementary File S2. Participant Information Sheet.pdf
- Supplementary File S3. Participant Consent Forms to participate in the survey.pdf
- Supplementary File S4. ENTWINE-iCOHORT Caregiver Baseline Survey.pdf
- Supplementary File S5. ENTWINE-iCOHORT Care Recipient Baseline Survey.pdf
- Supplementary File S6. ENTWINE-iCOHORT Caregiver Follow up Survey.pdf
- Supplementary File S7. ENTWINE-iCOHORT Care Recipient Follow up Survey.pdf
- Supplementary File S8. ENTWINE-iCOHORT Diary Study Weekly Measures-Caregiver version.pdf
- Supplementary File S9. ENTWINE-iCOHORT Diary Study Weekly Measures-Care Recipient.pdf
